# Supplementary material for: Facile Synthesis of 2H-Benzo[h]Chromenes via an Arylamine-Catalyzed Mannich Cyclization Cascade Reaction
Source: MDPI journal article supplement (doi:10.3390/molecules26123617), 2021-06-12

## ***Supplementary Materials***

### **Facile Synthesis of 2*H*-Benzo[*h*]chromenes via an Arylamine-catalyzed Mannich-cyclization Cascade Reaction**

**Yueteng Zhang<sup>1,2\*</sup>, Peng Ji<sup>1</sup>, Xiang Meng<sup>1</sup>, Feng Gao<sup>1</sup>, Fanxun Zeng<sup>1</sup>, Wei Wang<sup>1\*</sup>**

*<sup>1</sup>Departments of Pharmacology and Toxicology and Chemistry and Biochemistry, and BIO5 Institute, University of Arizona, Tucson, Arizona 85721, USA*

*<sup>2</sup>The School of Basic Medical Sciences, The Academy of Medical Science, Zhengzhou University, 100 Kexue Avenue, Zhengzhou, 450001, Henan, China*

# Original $^1\text{H}$ and $^{13}\text{C}$ NMR spectra

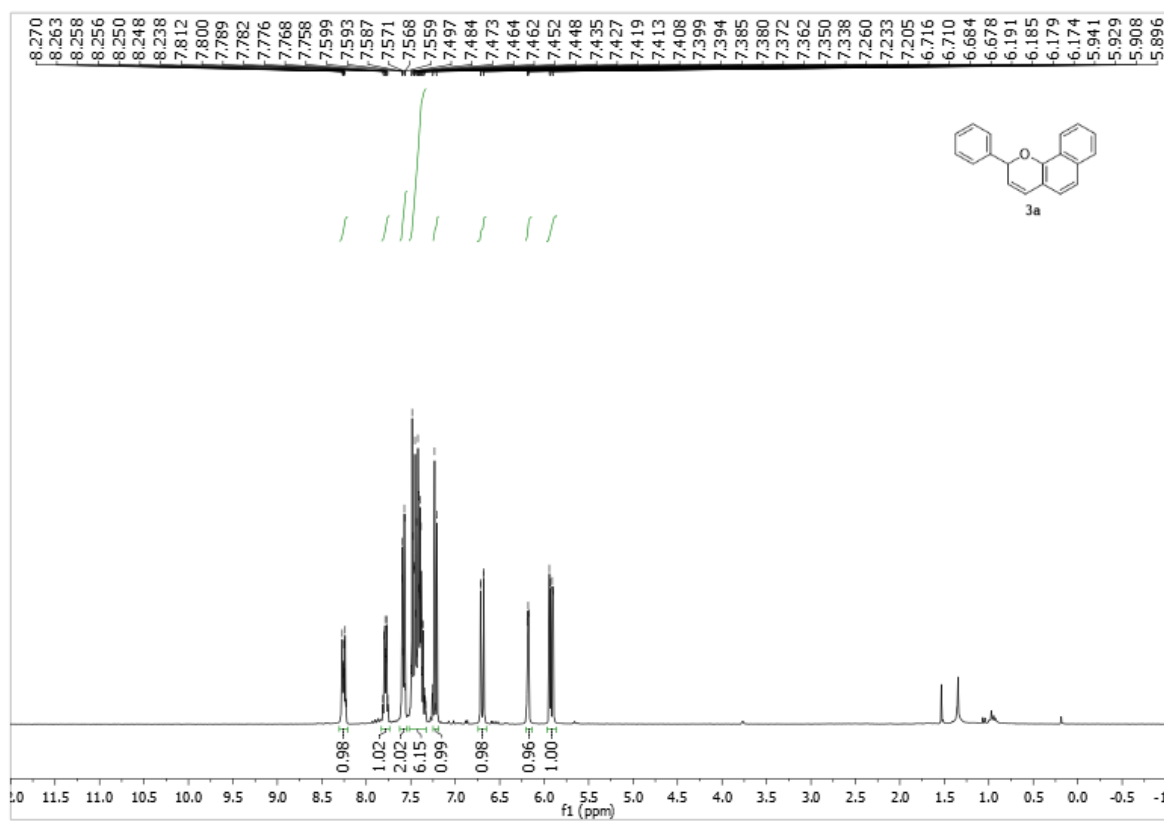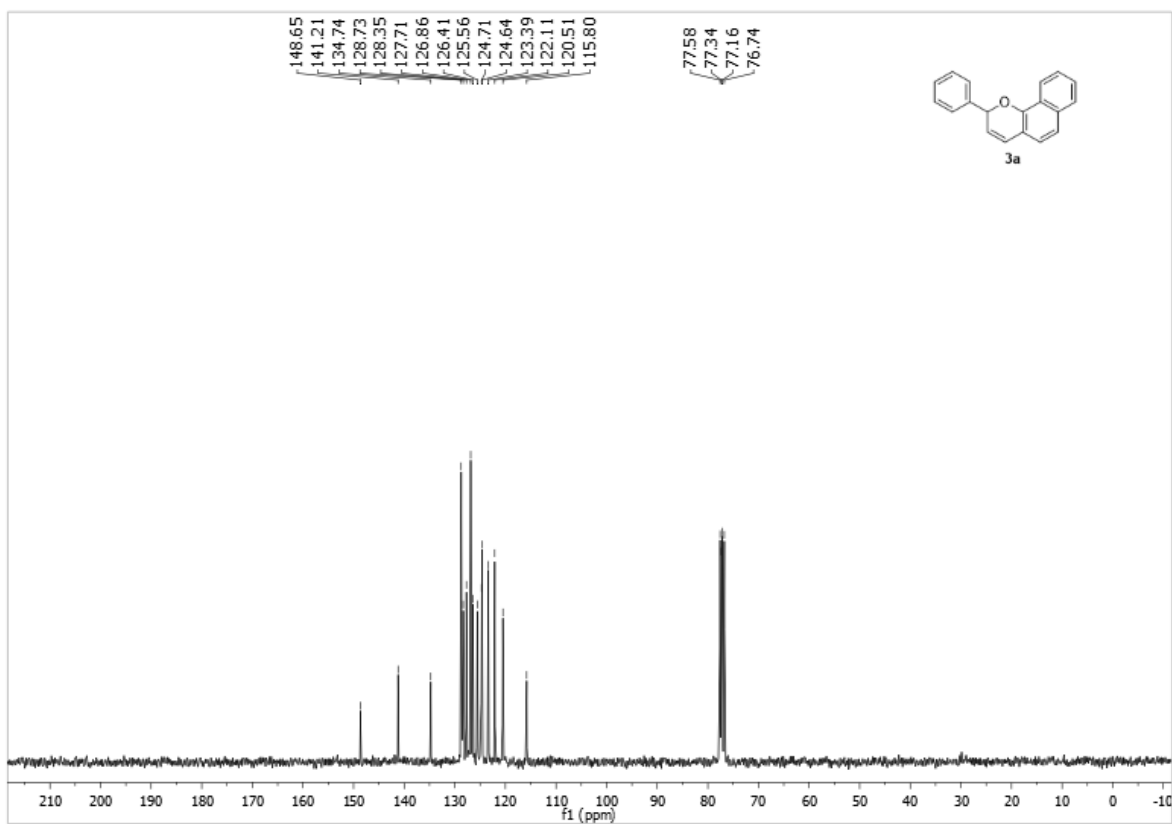

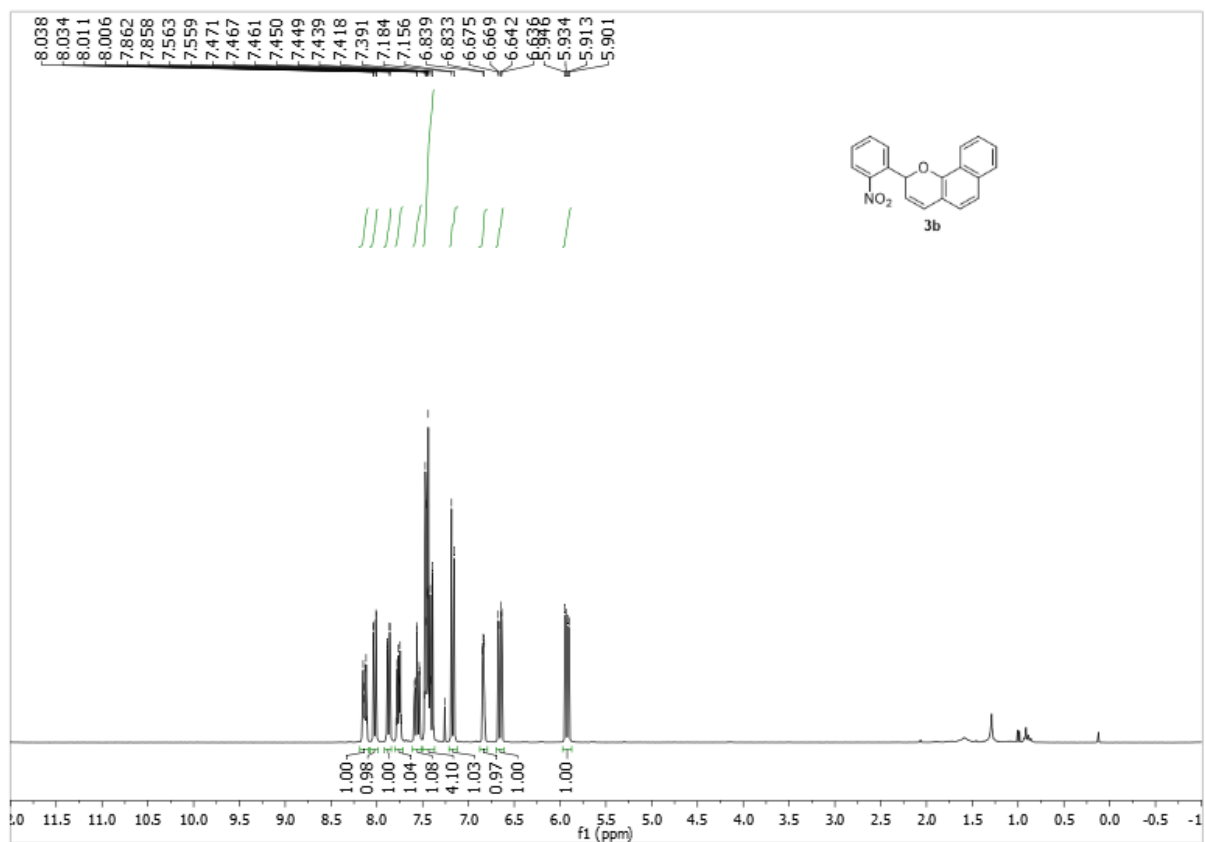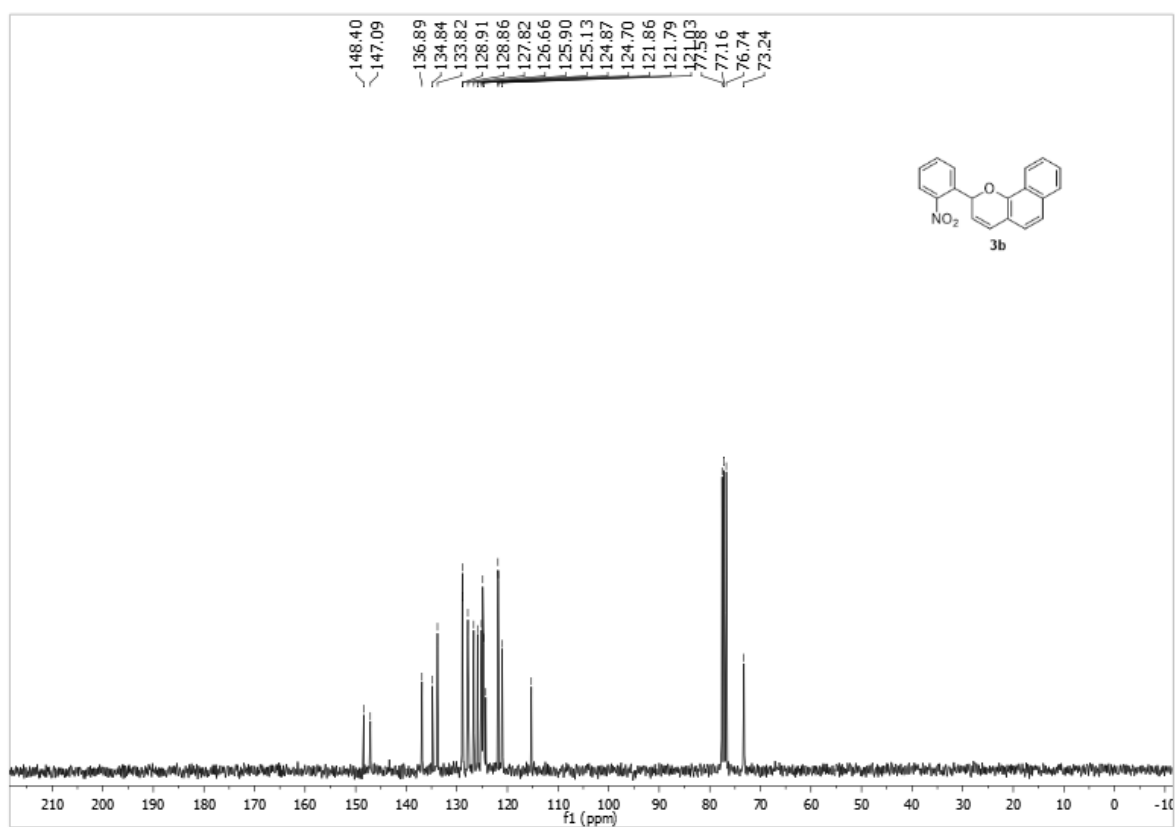

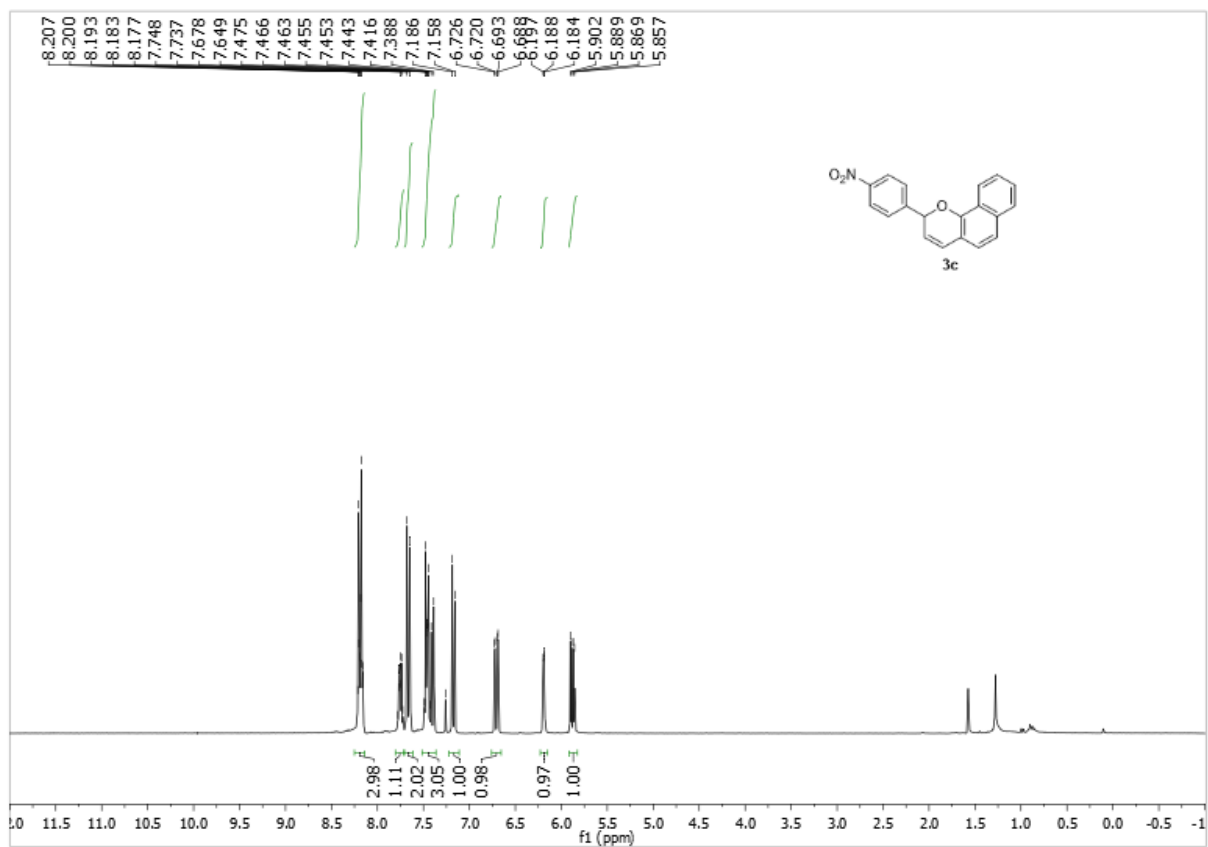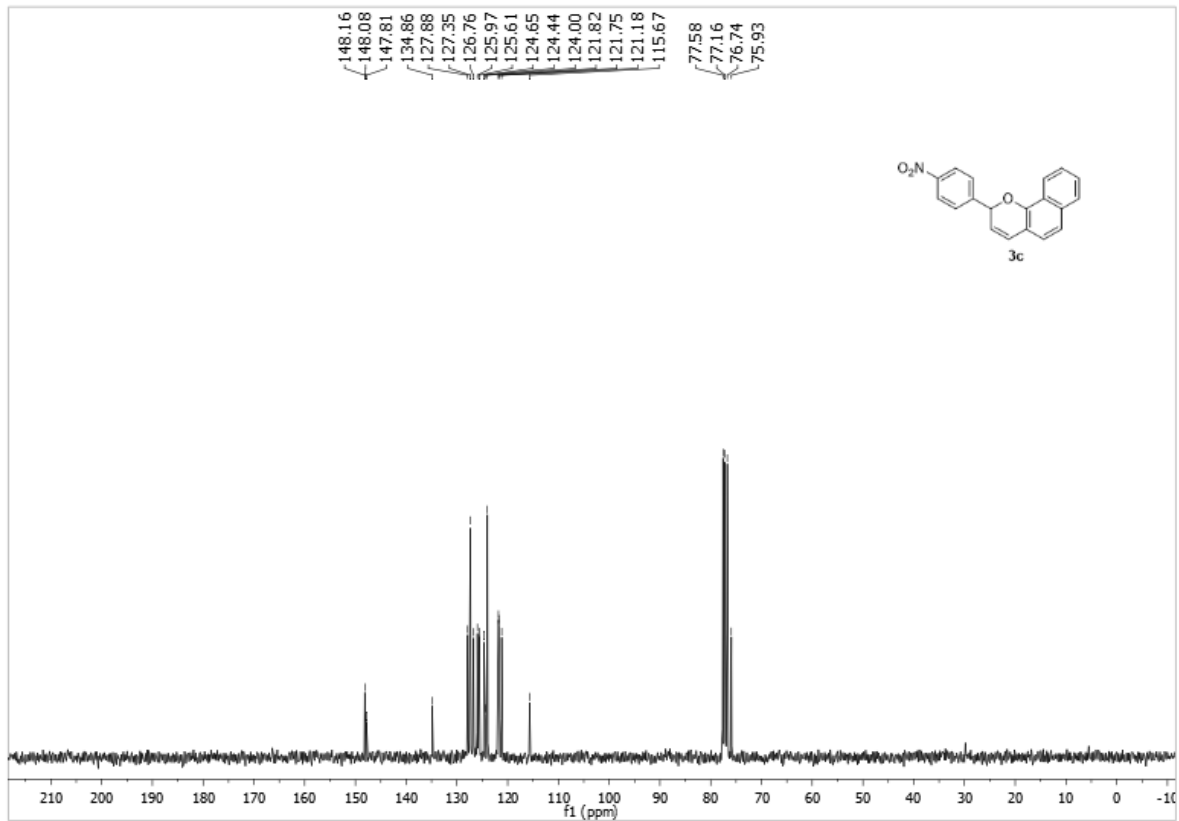

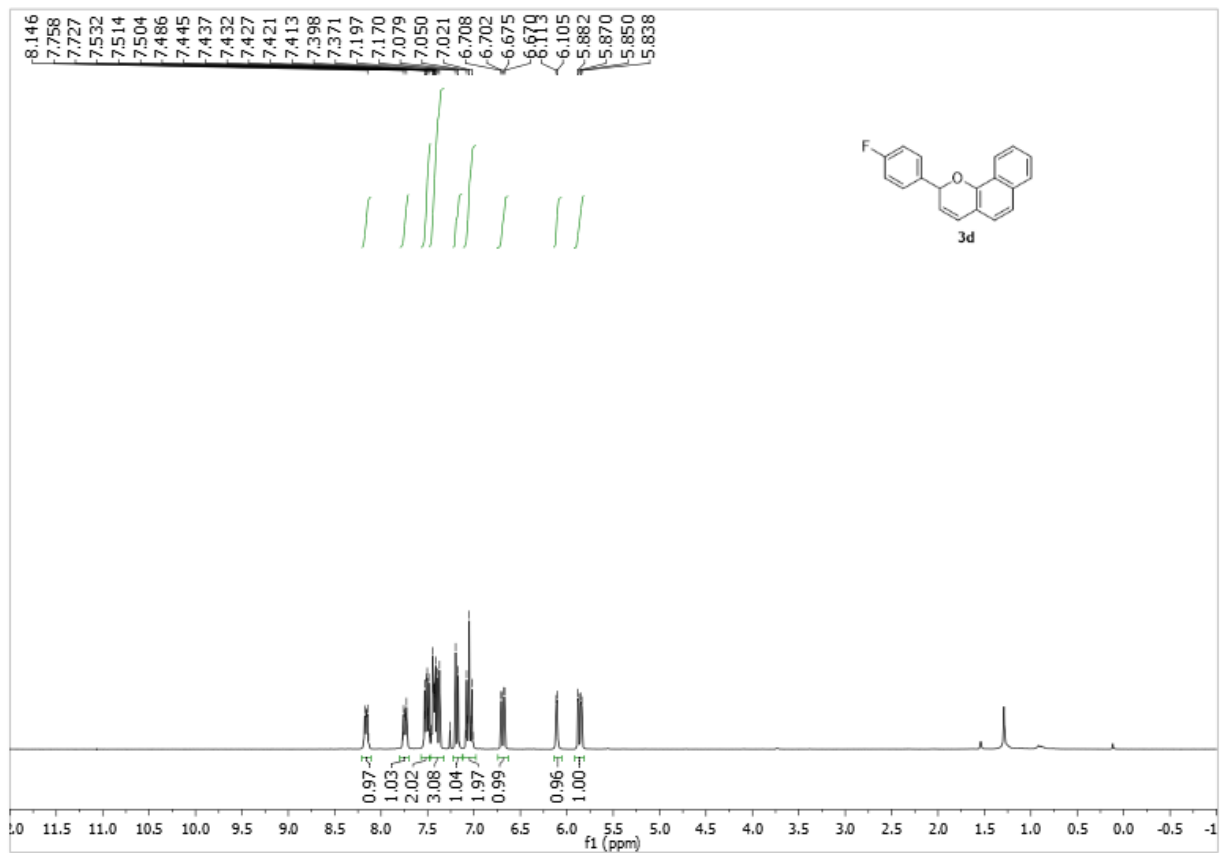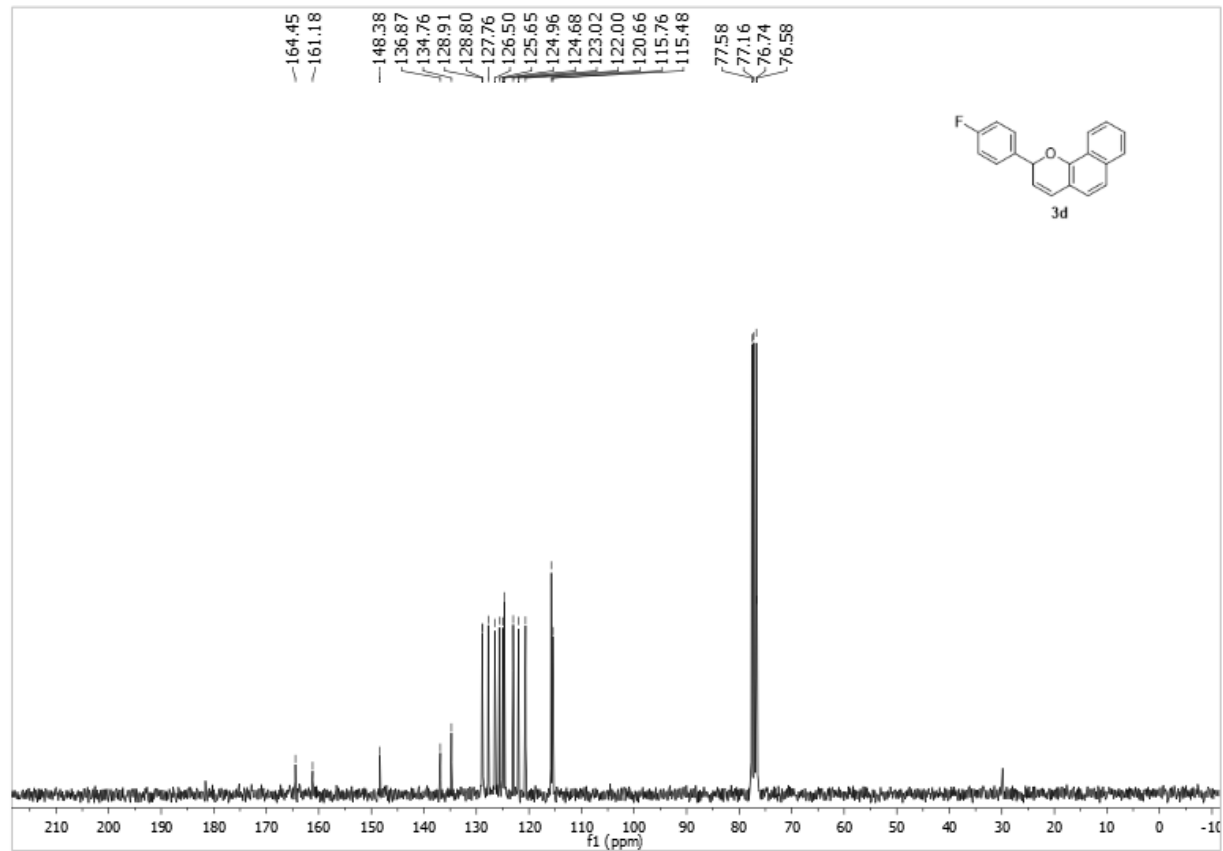

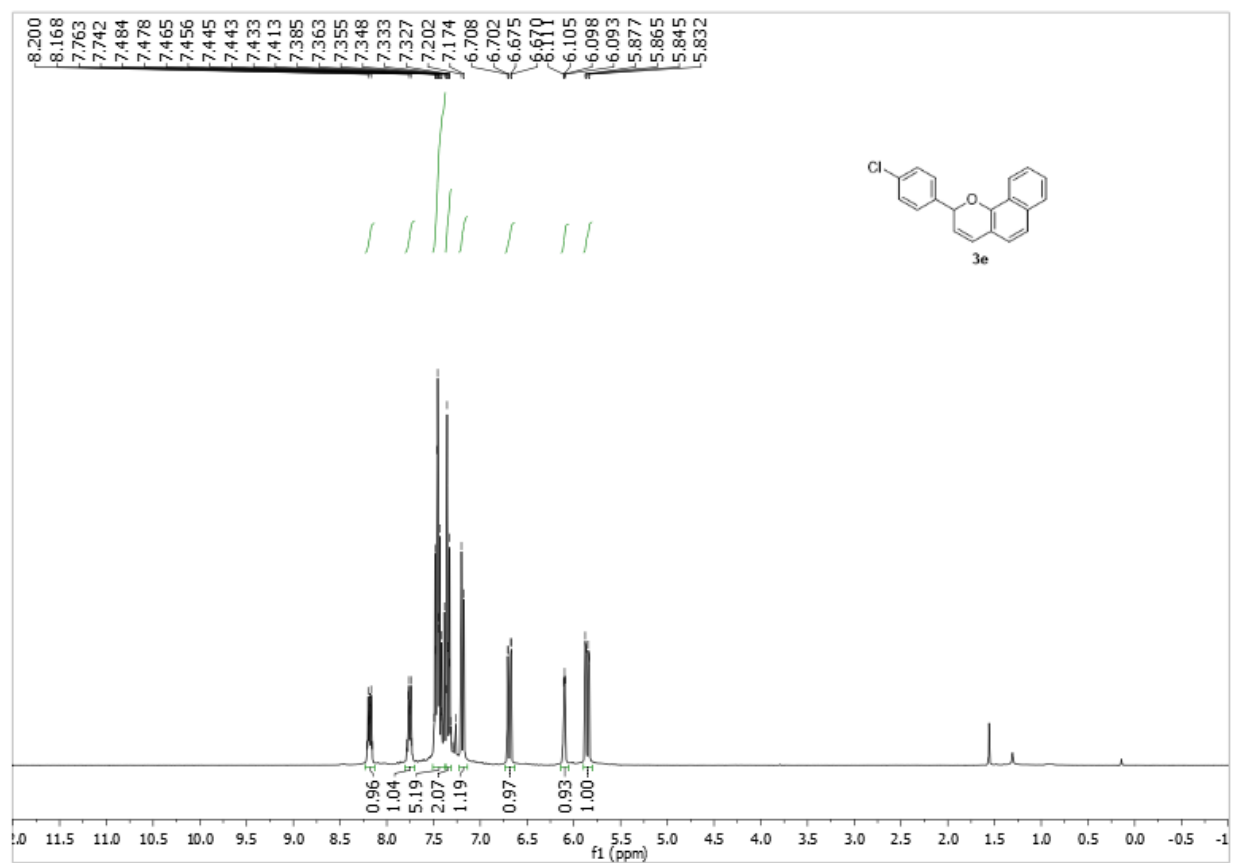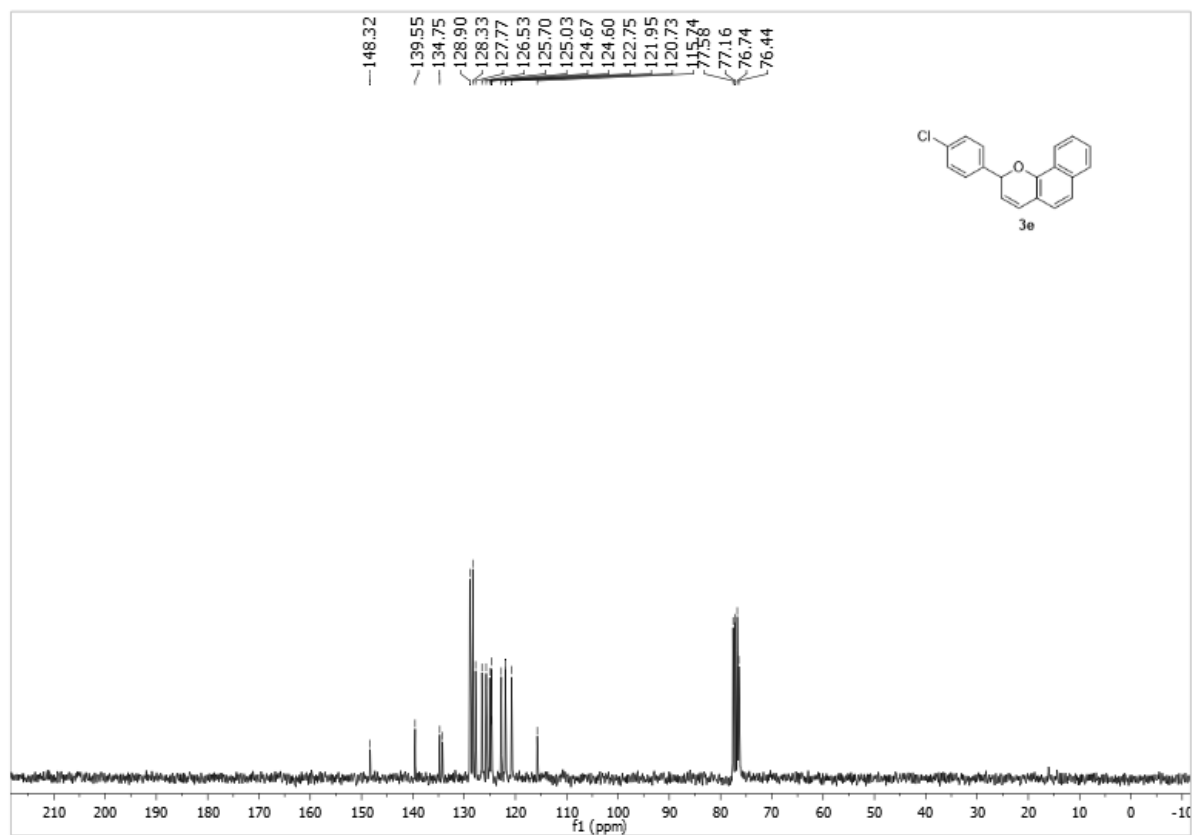

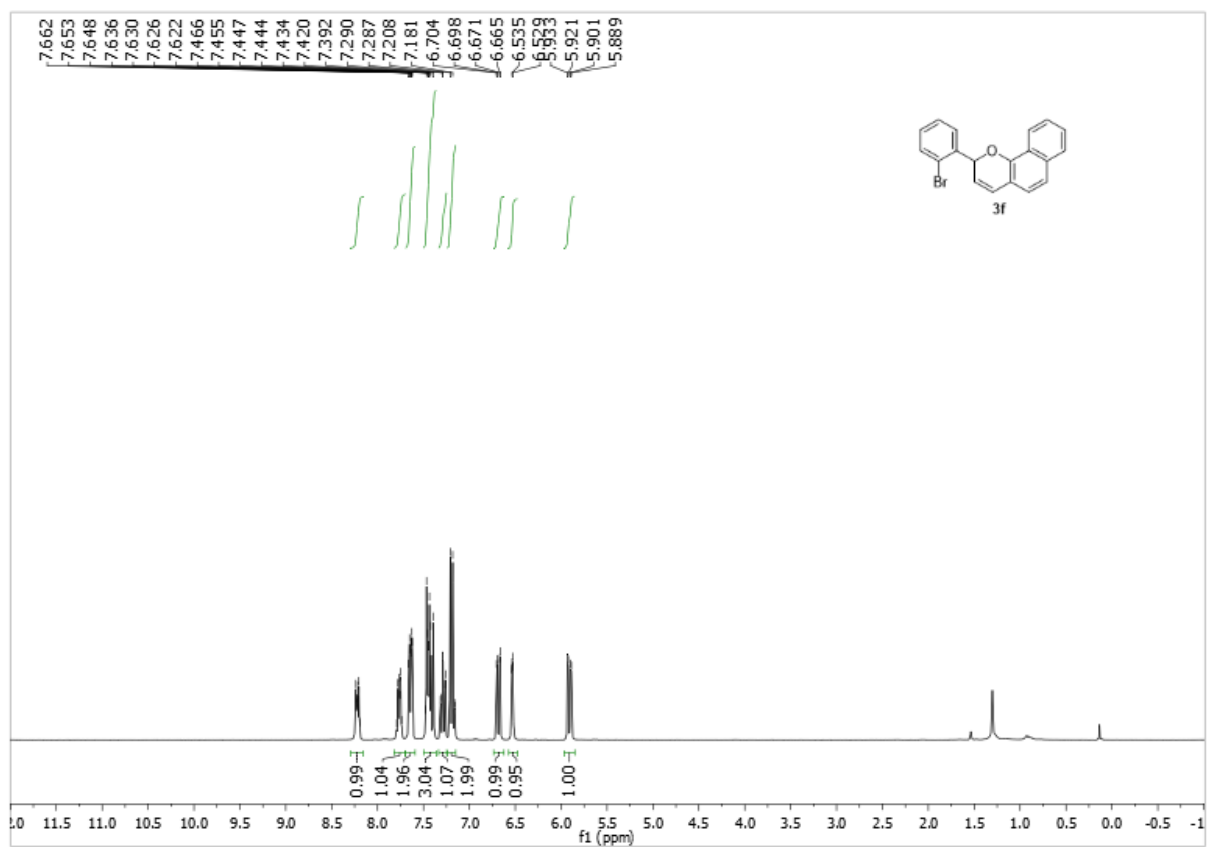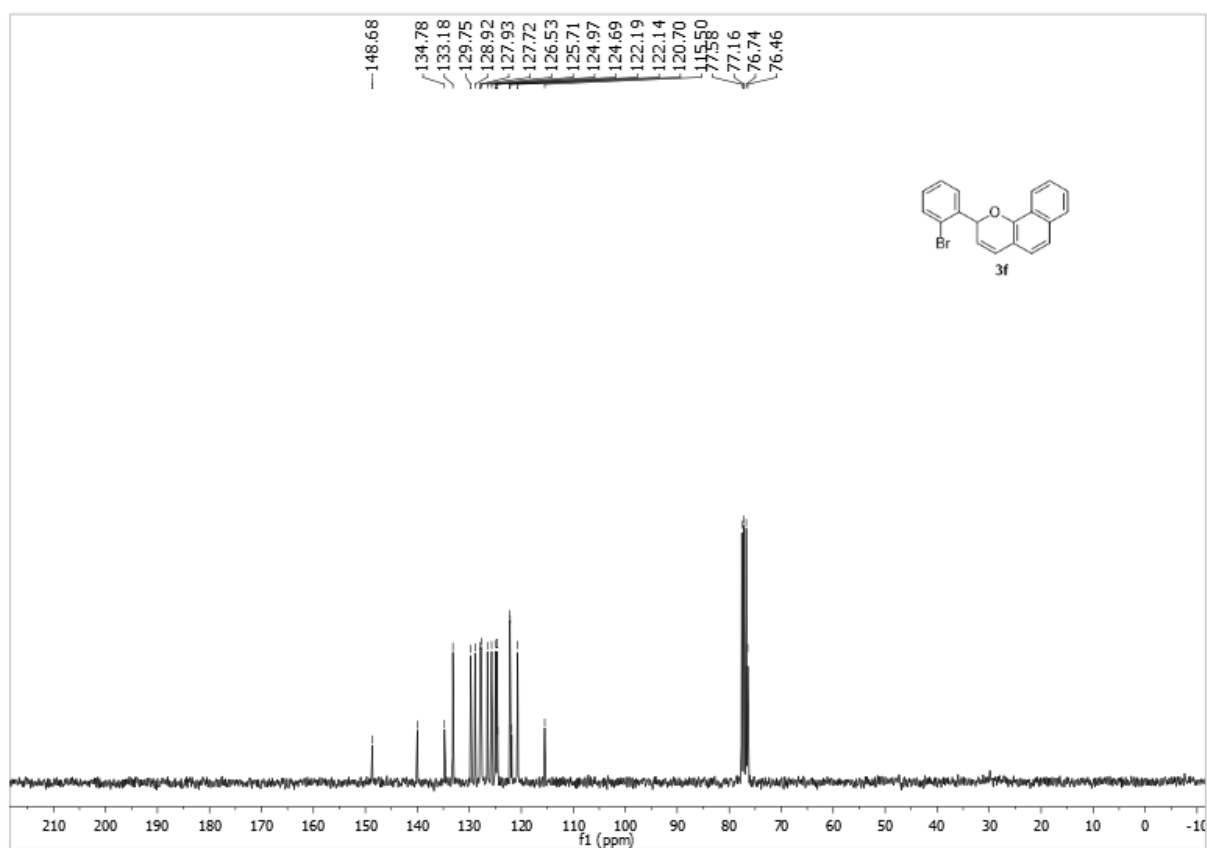

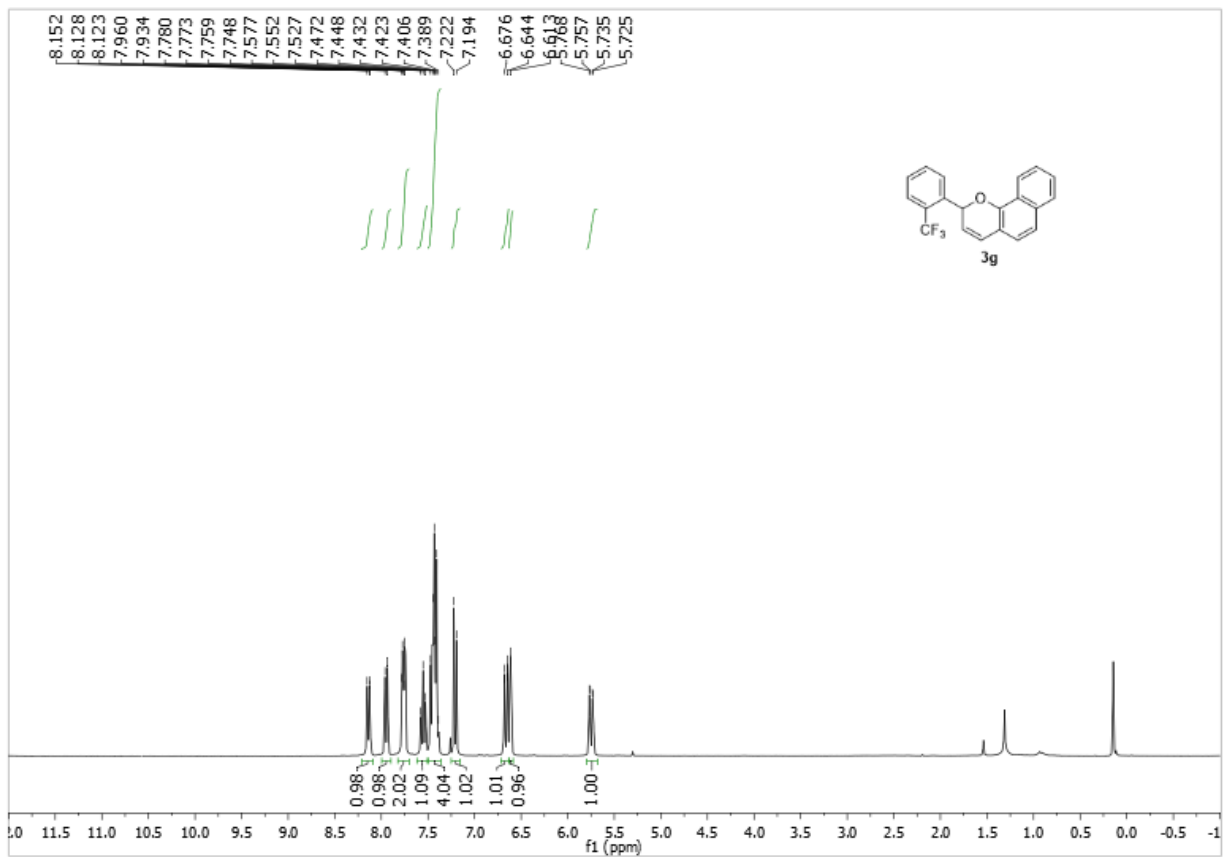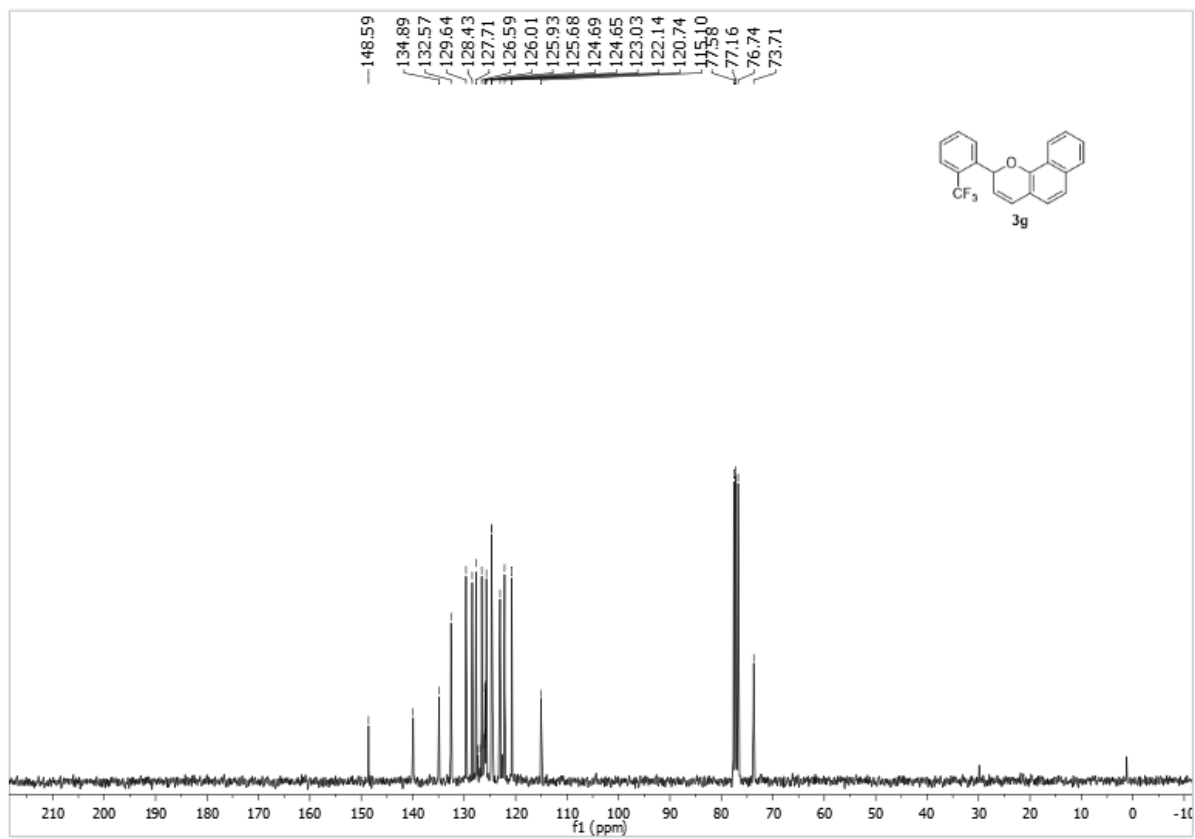



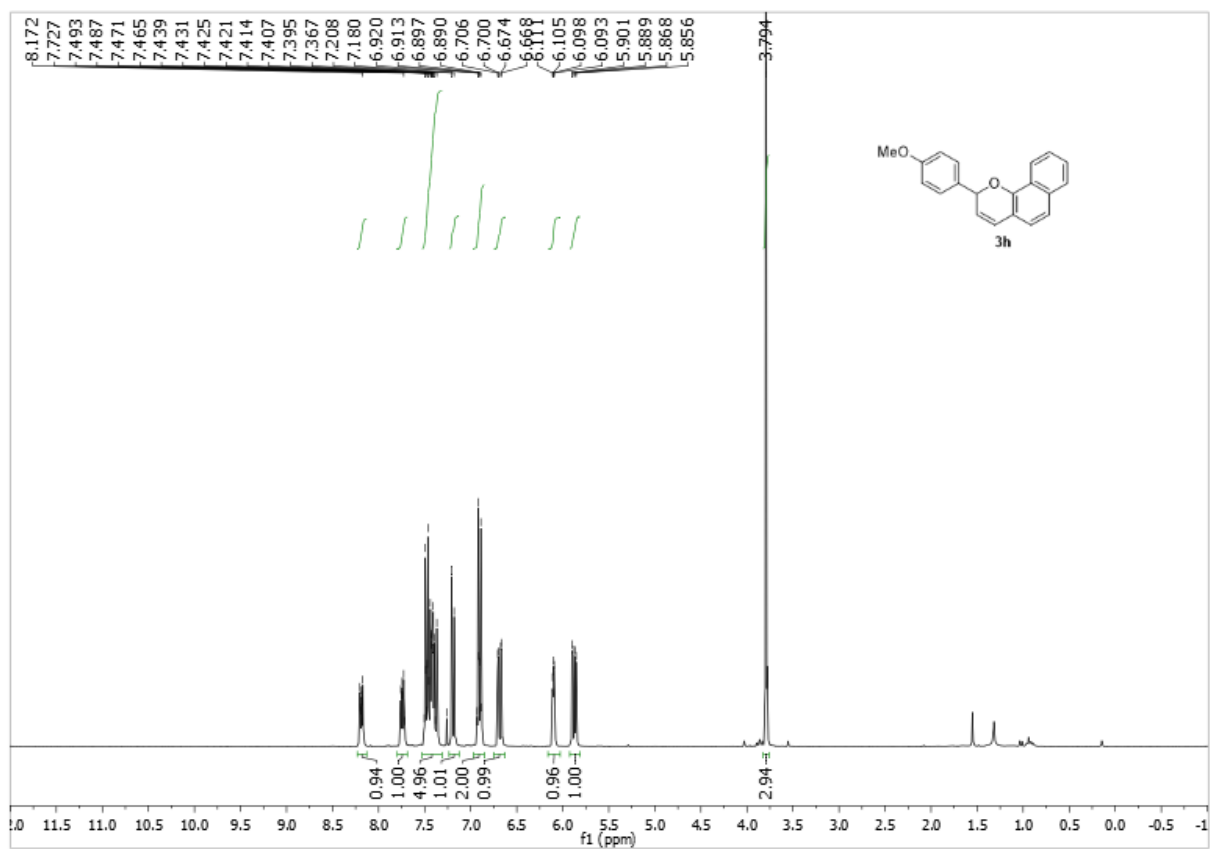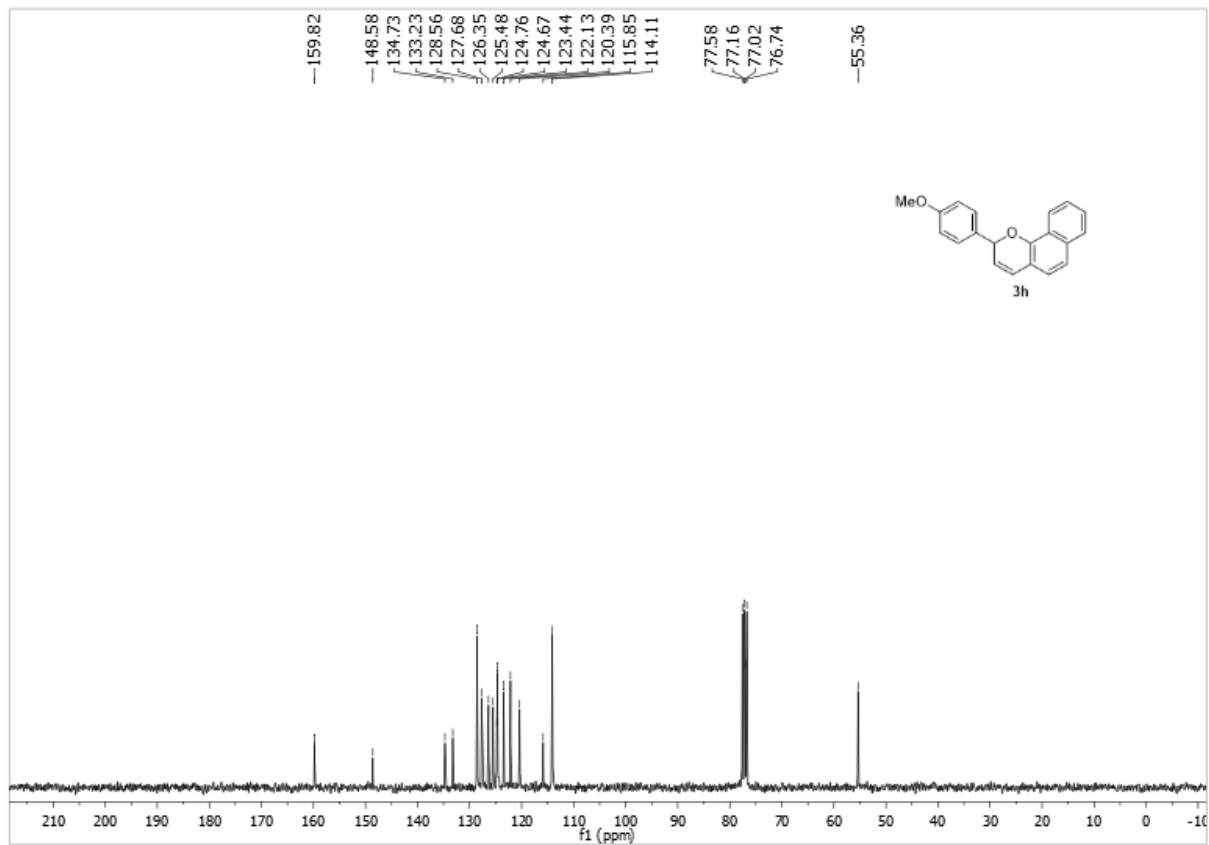

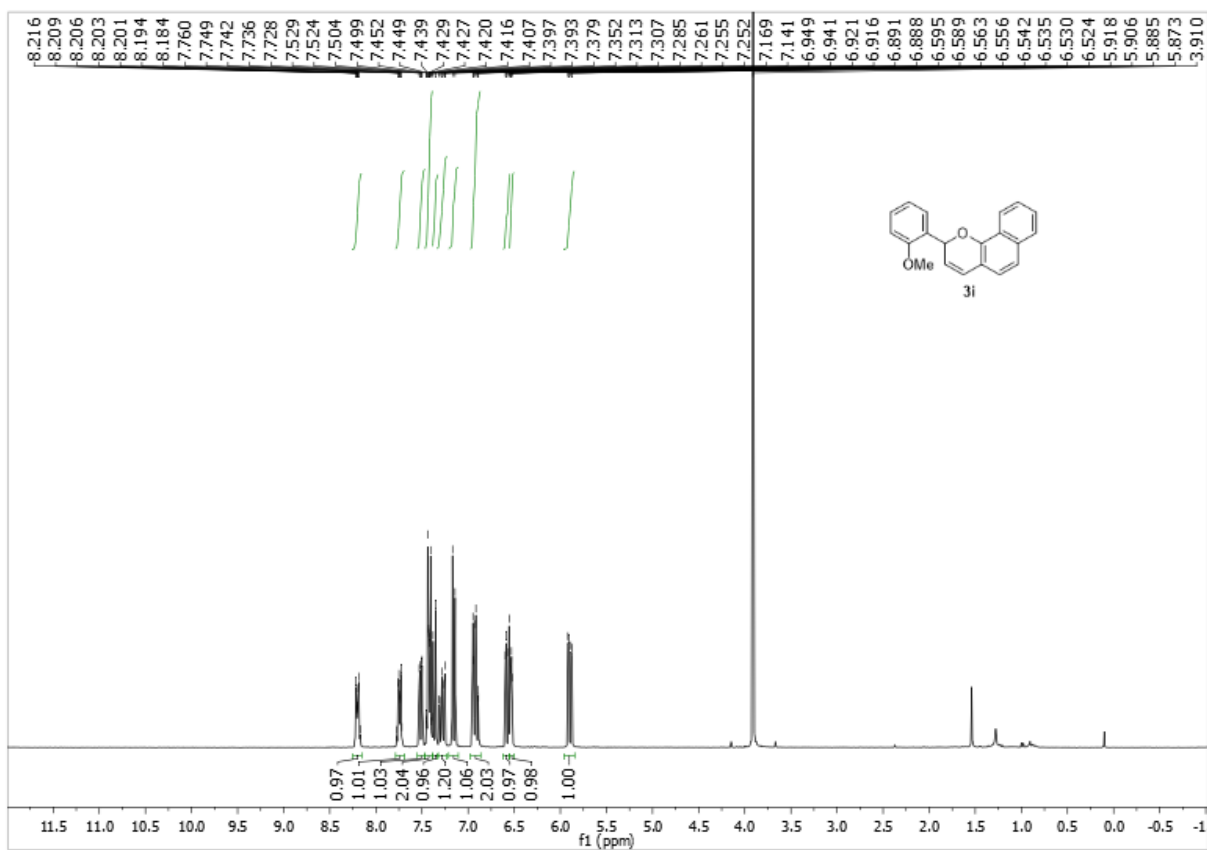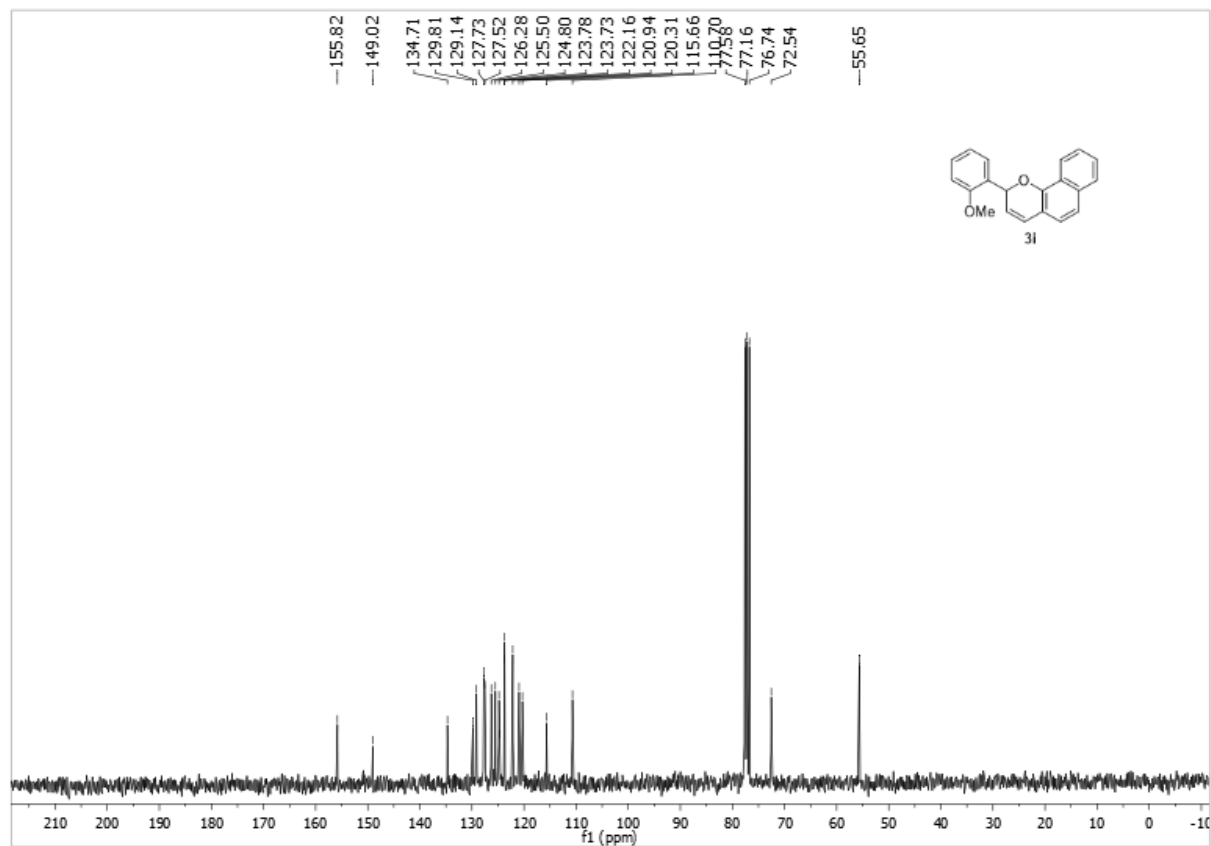

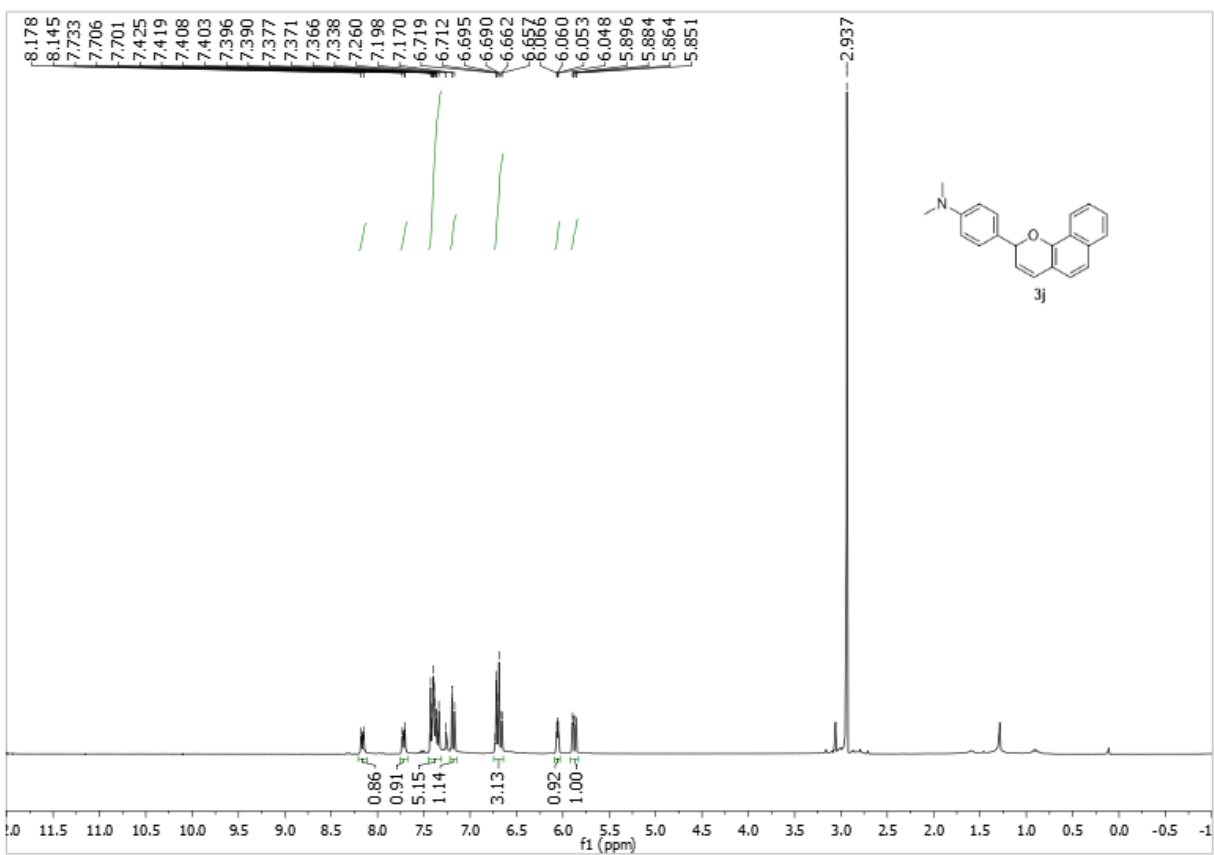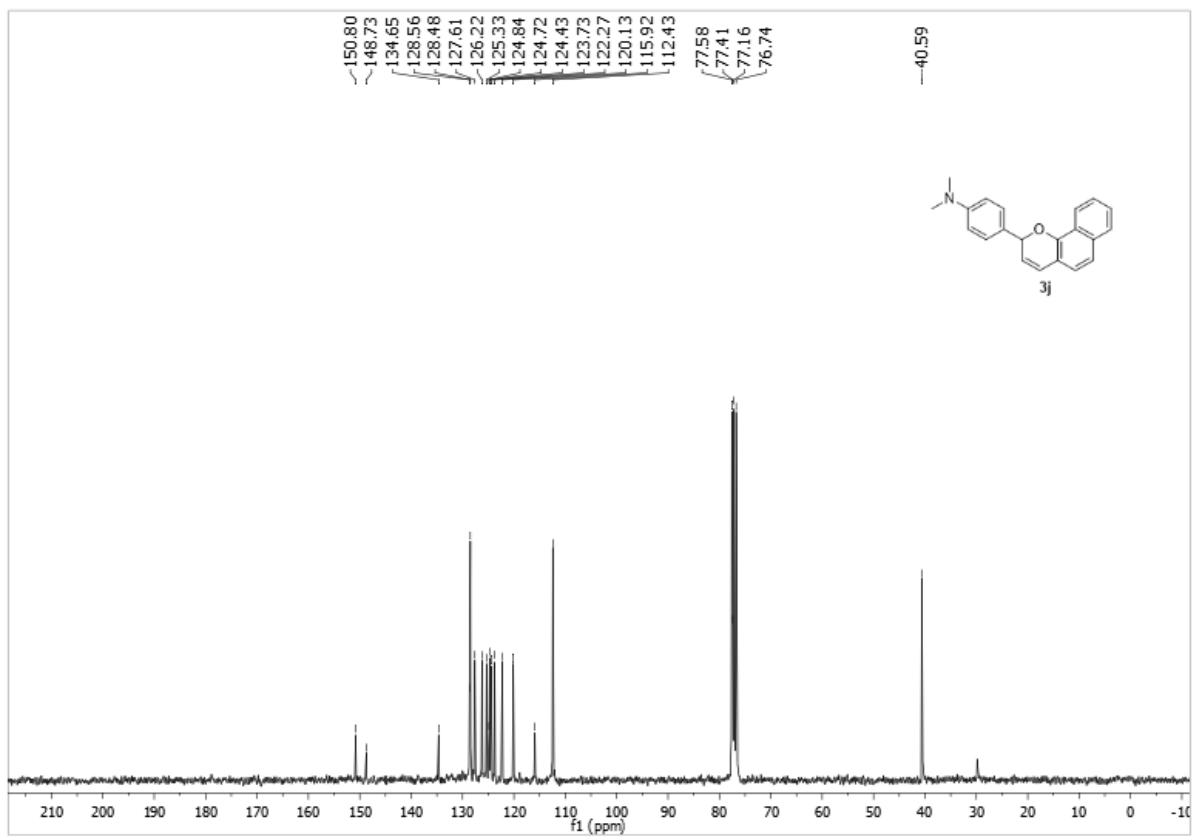

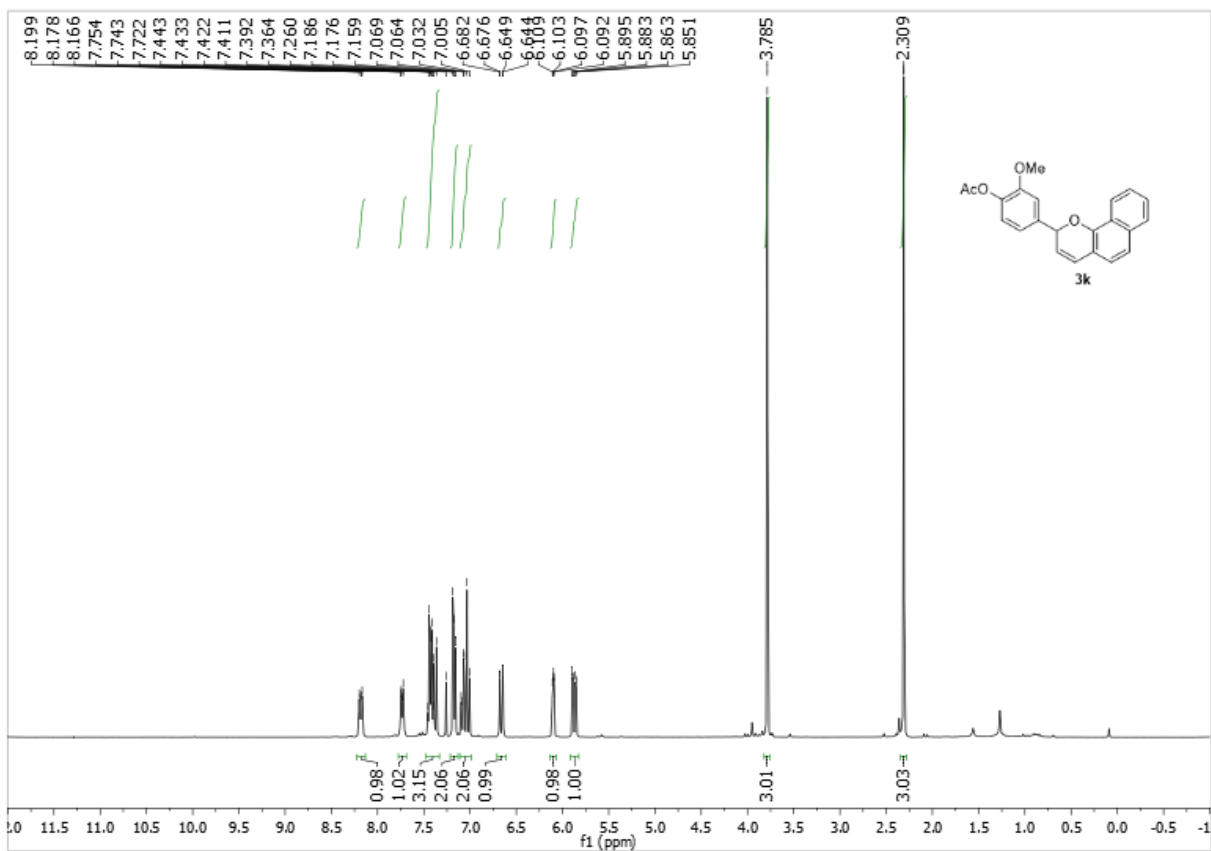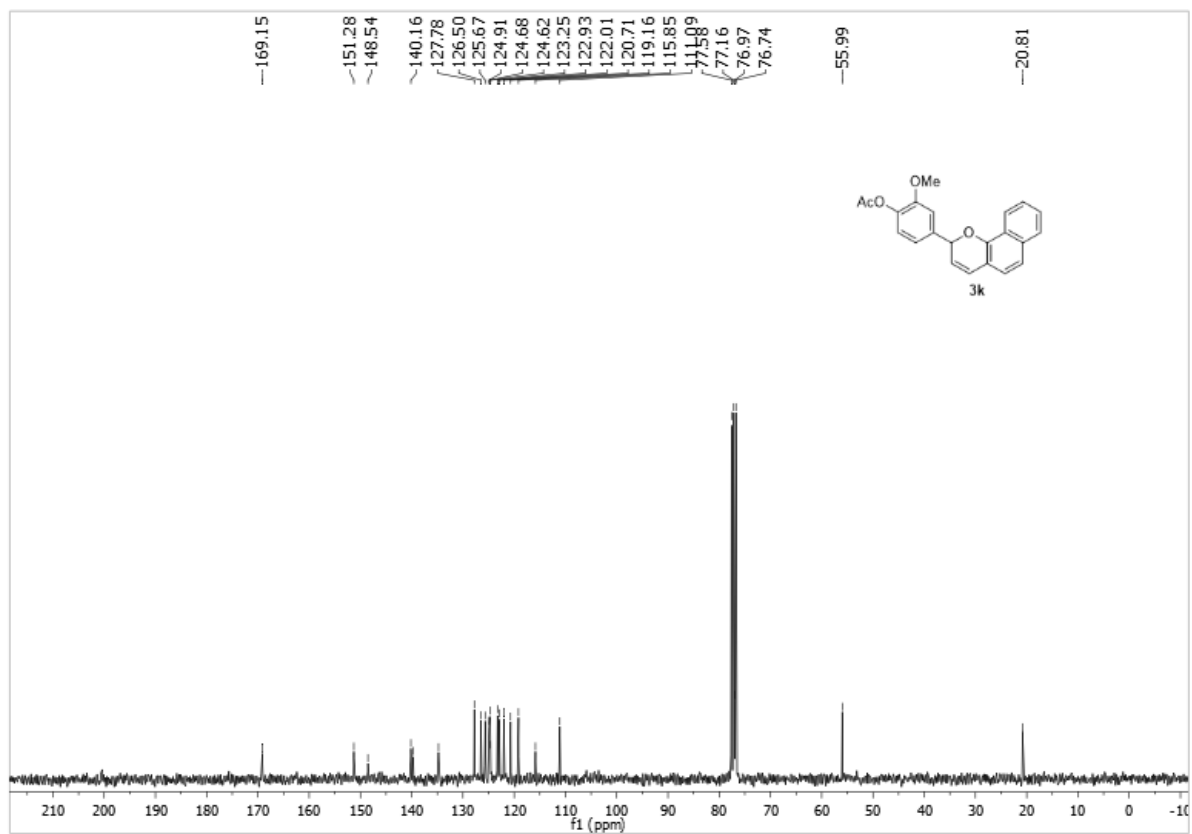

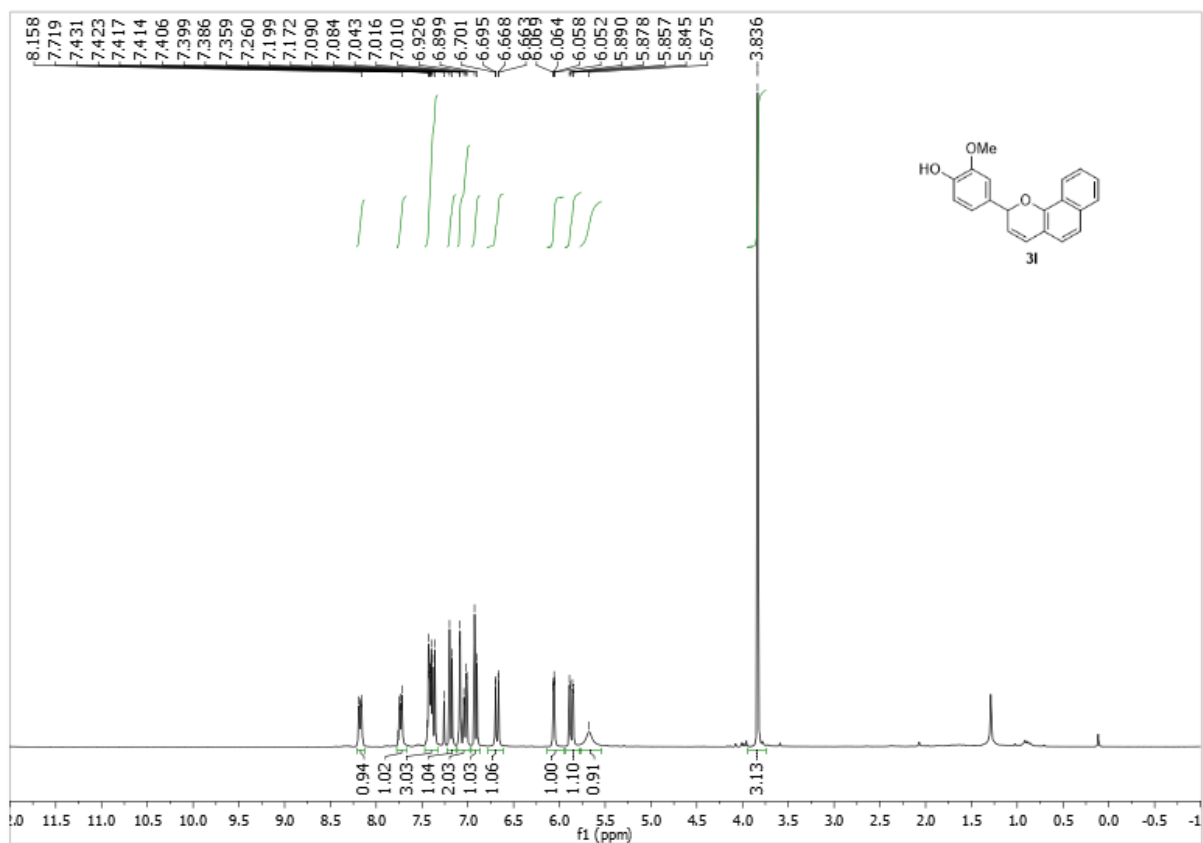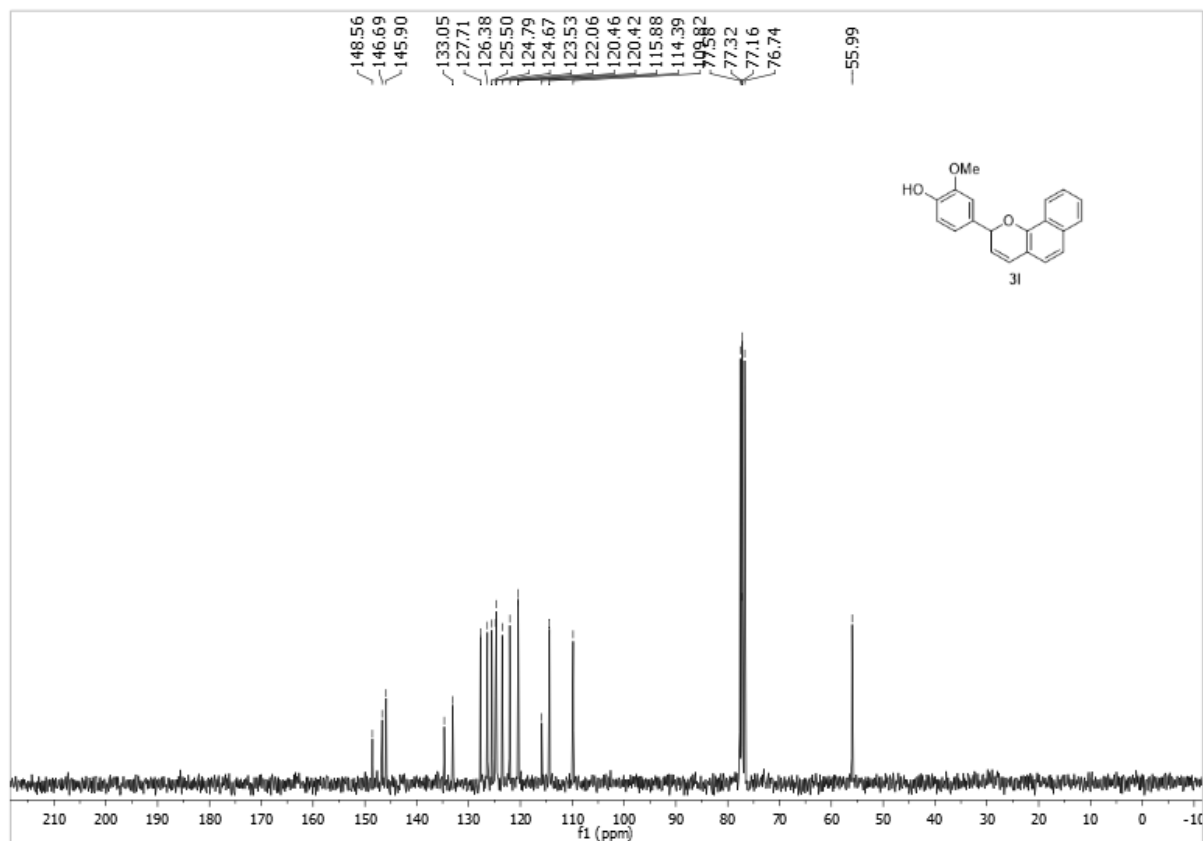

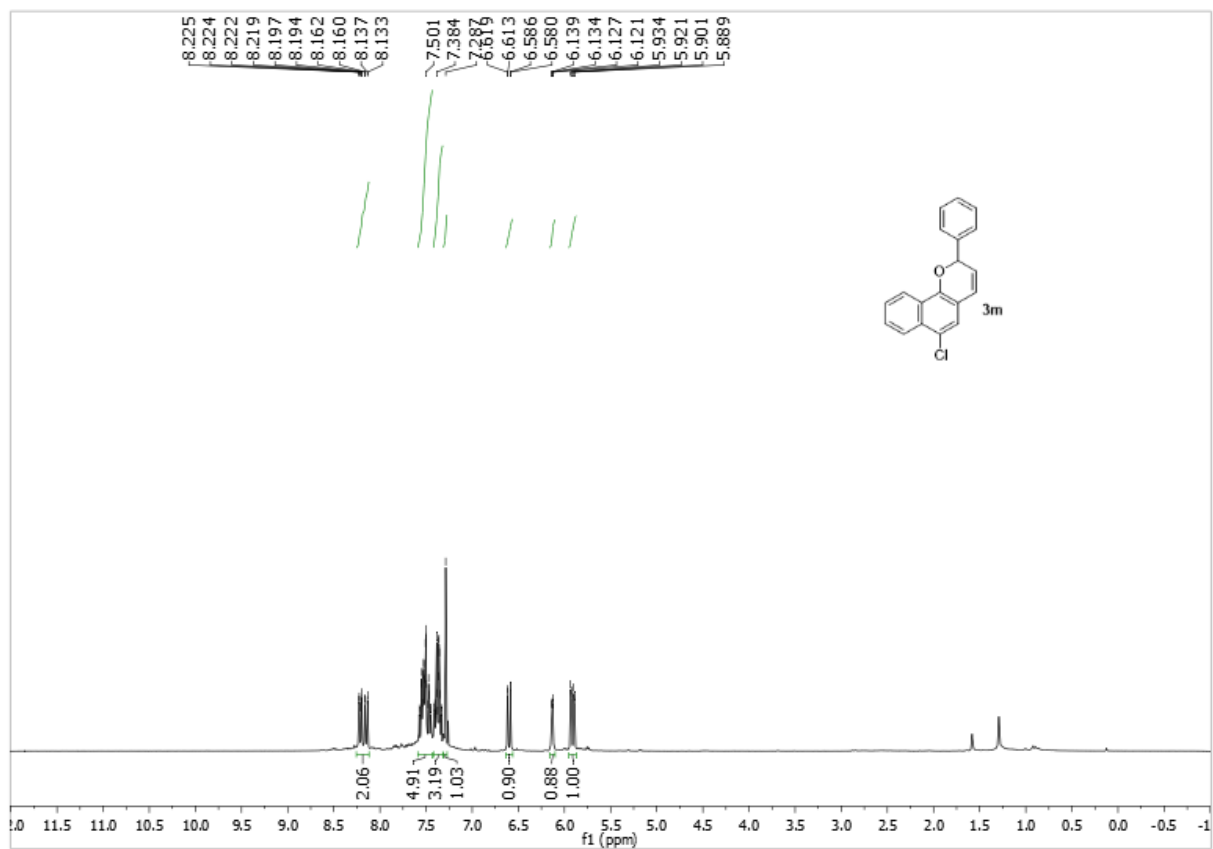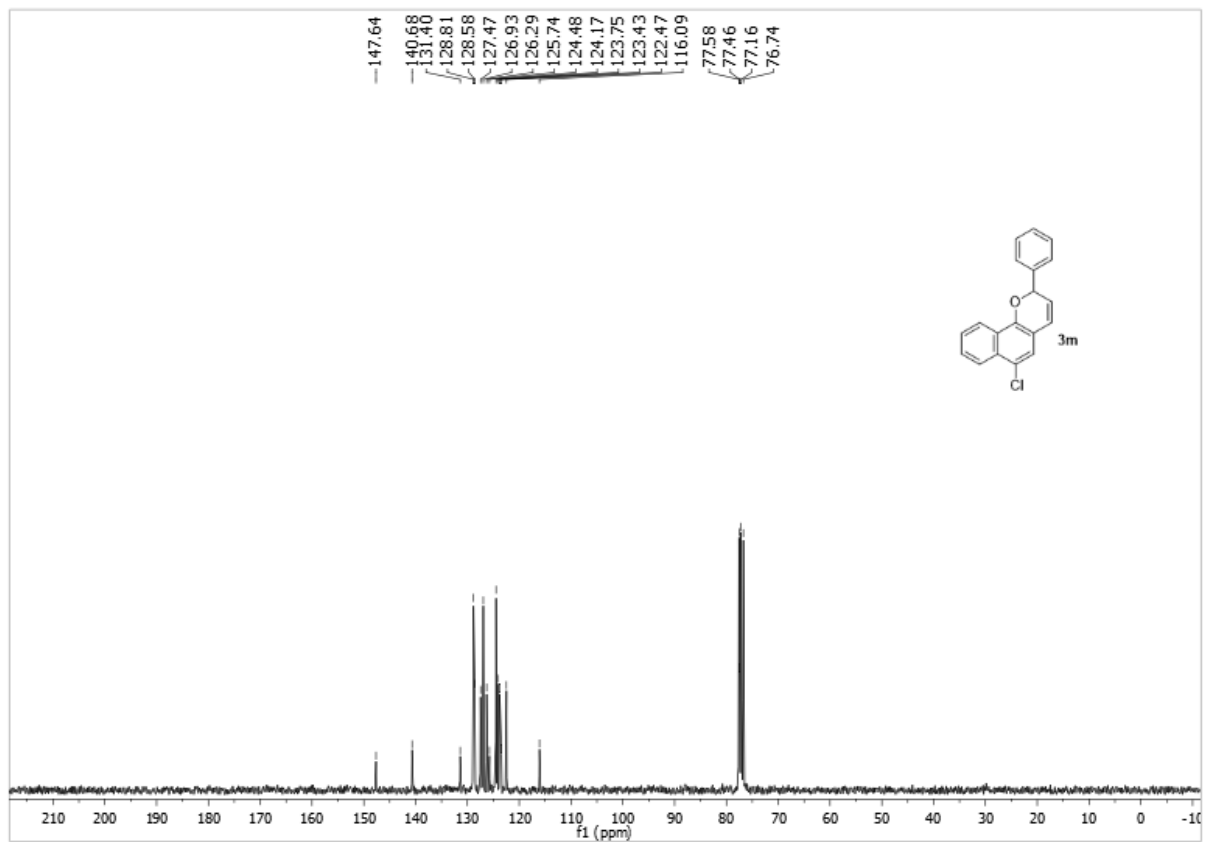

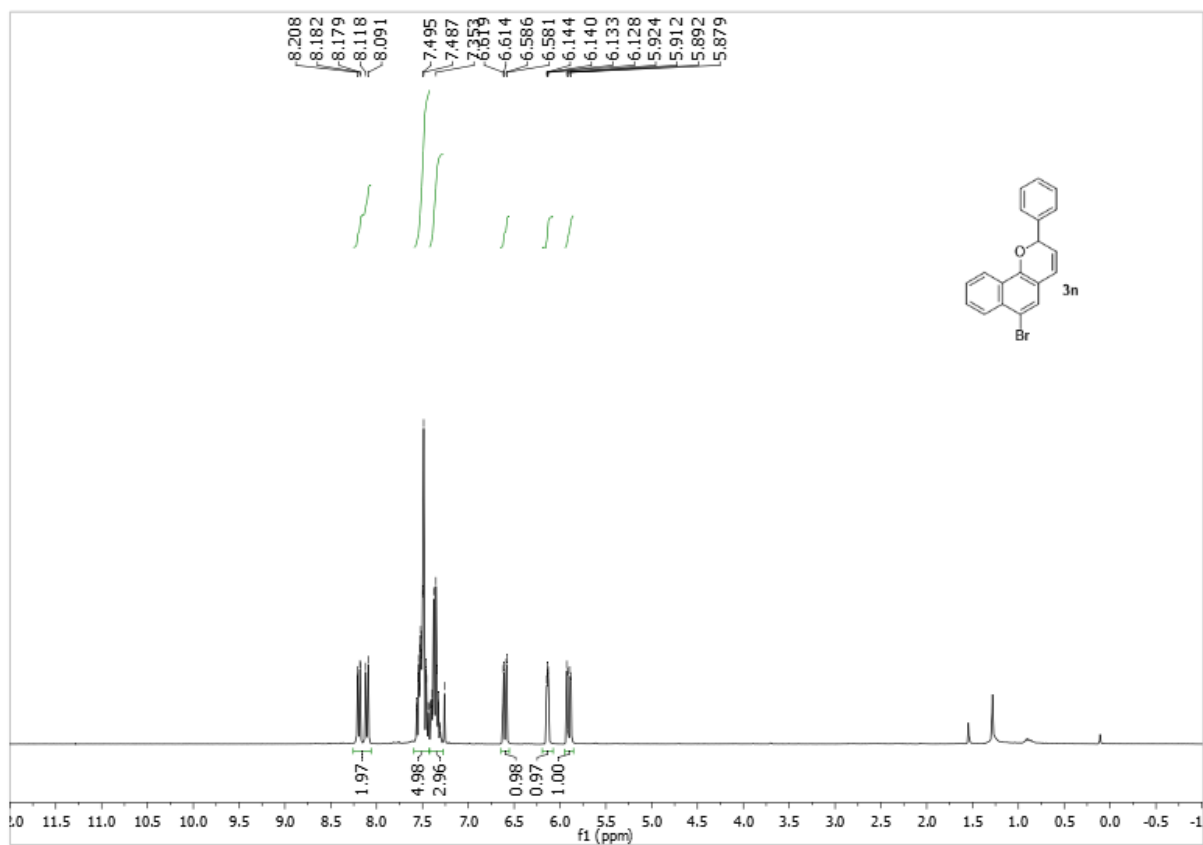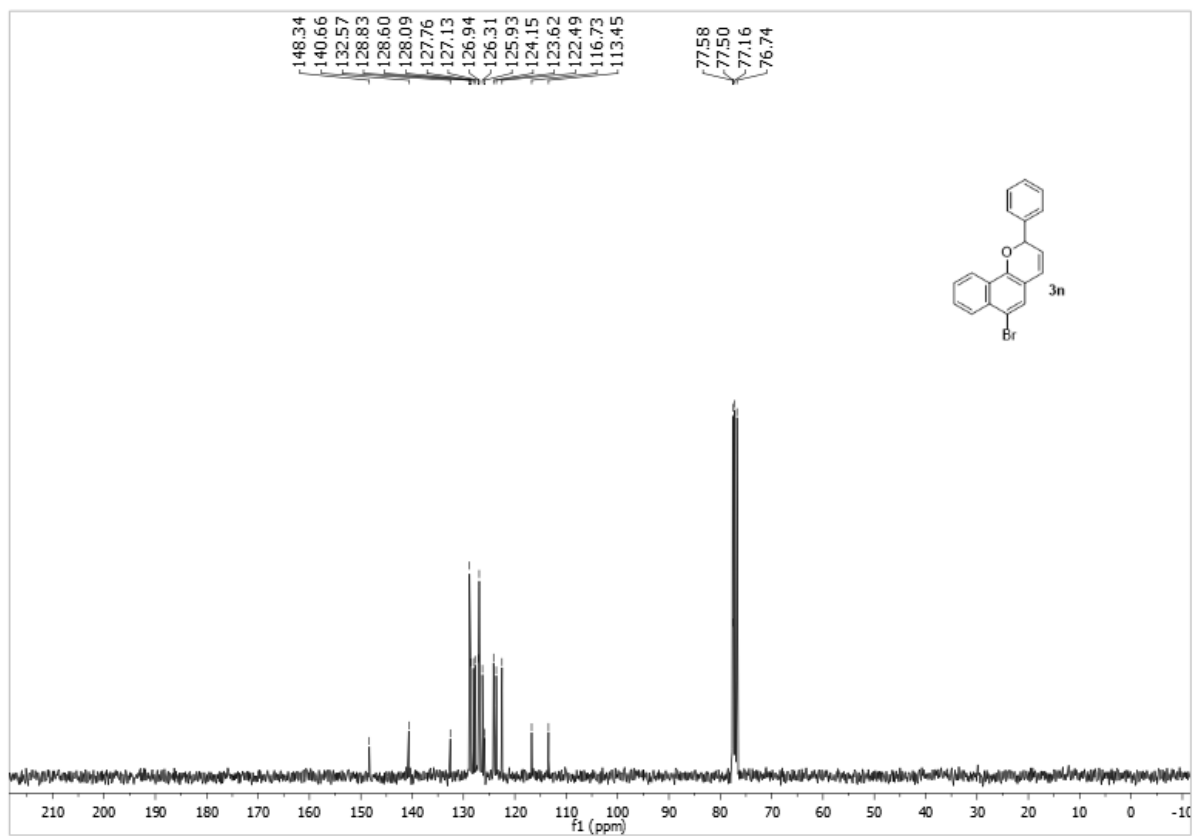

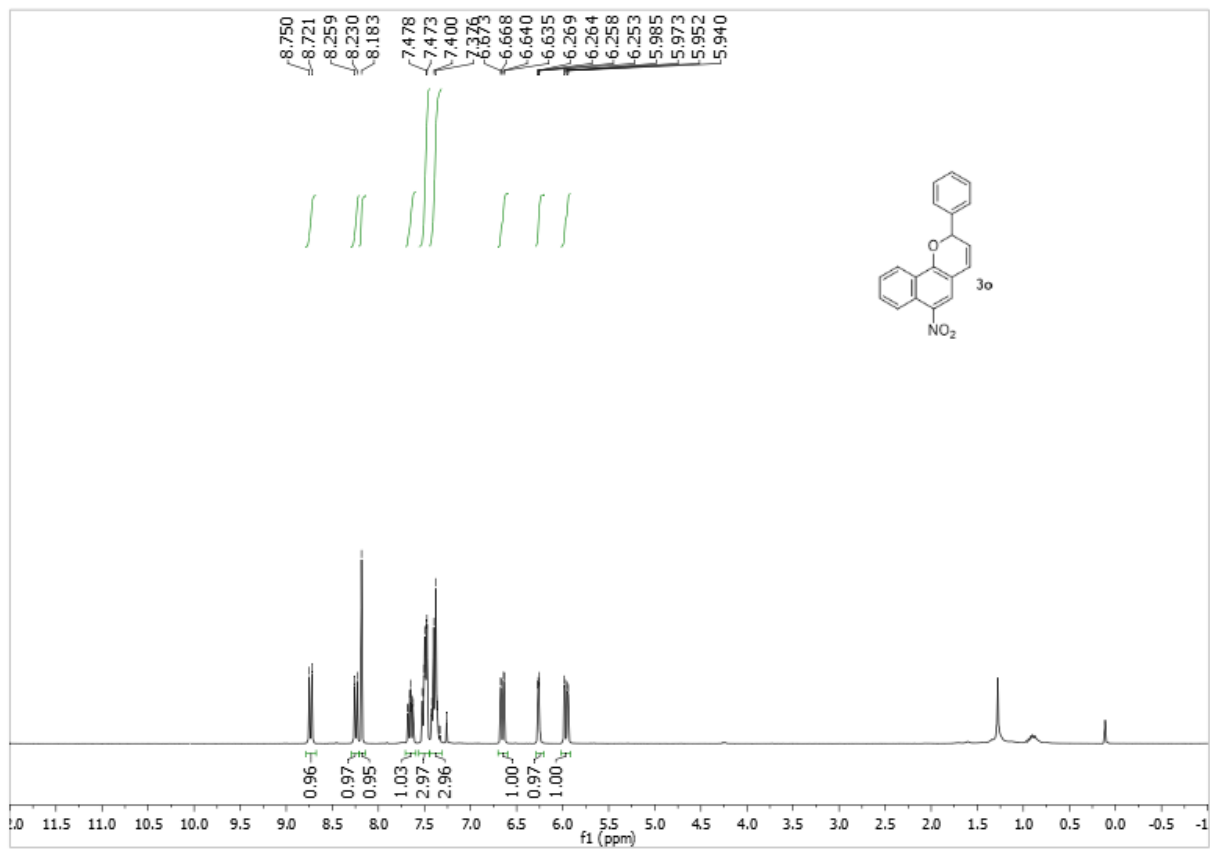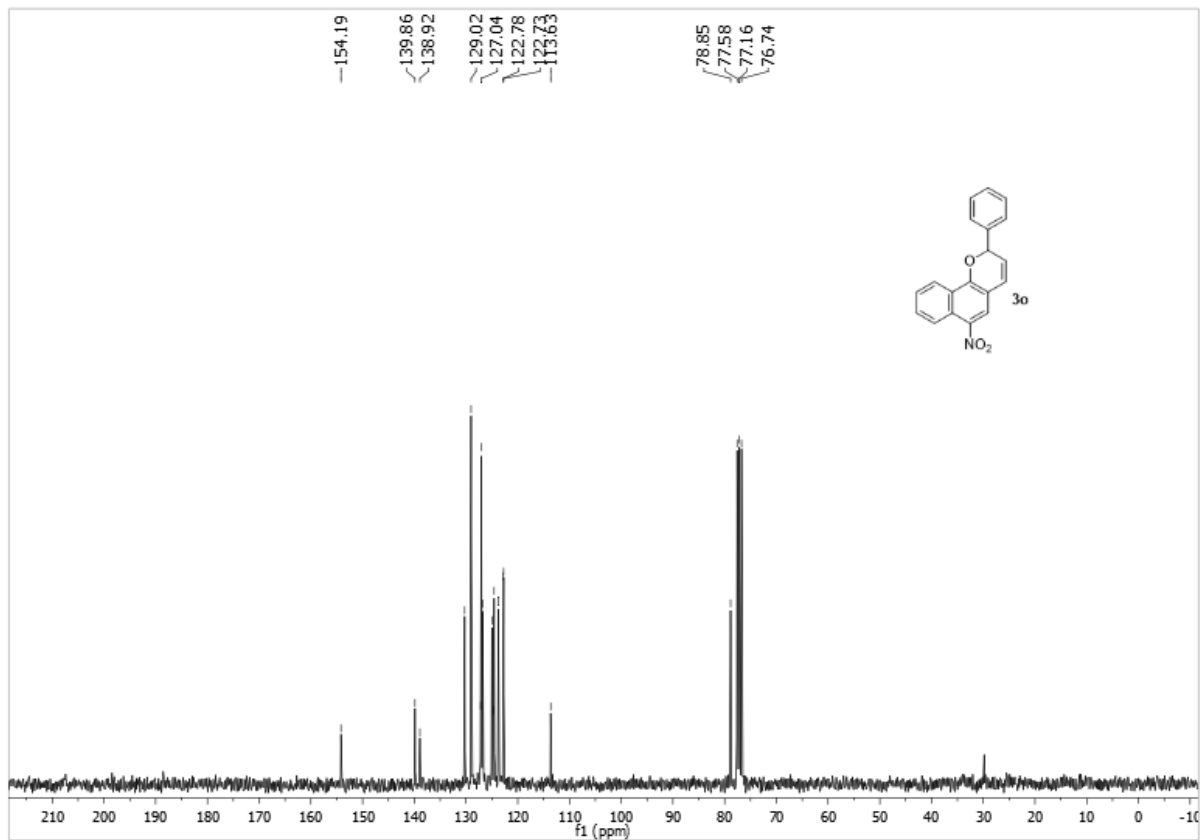



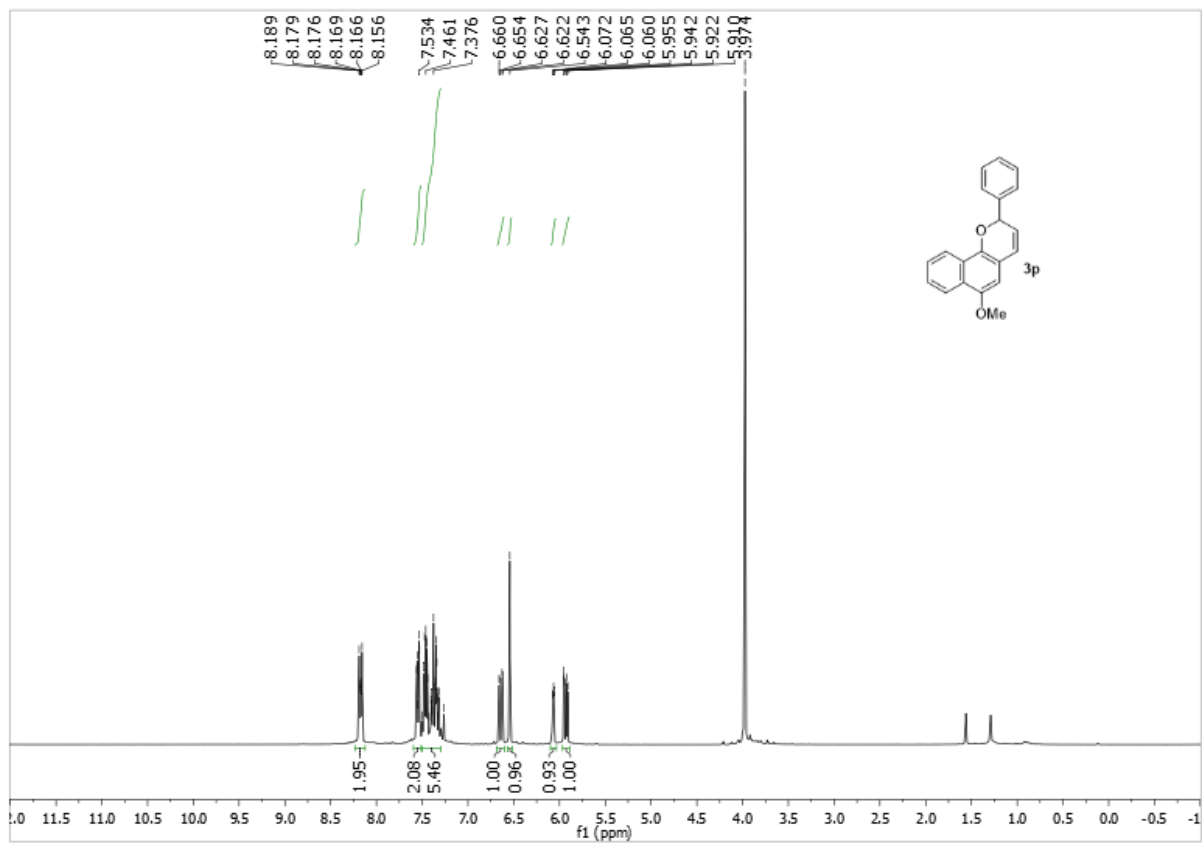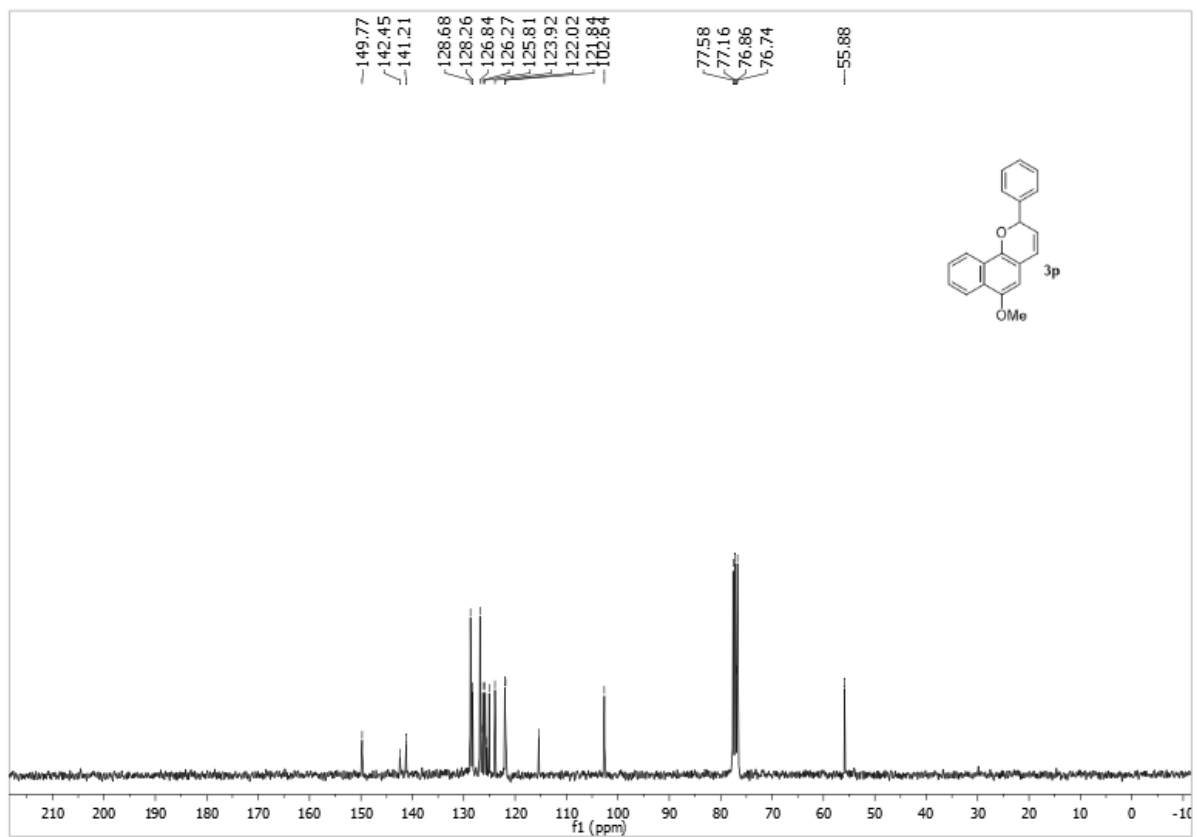

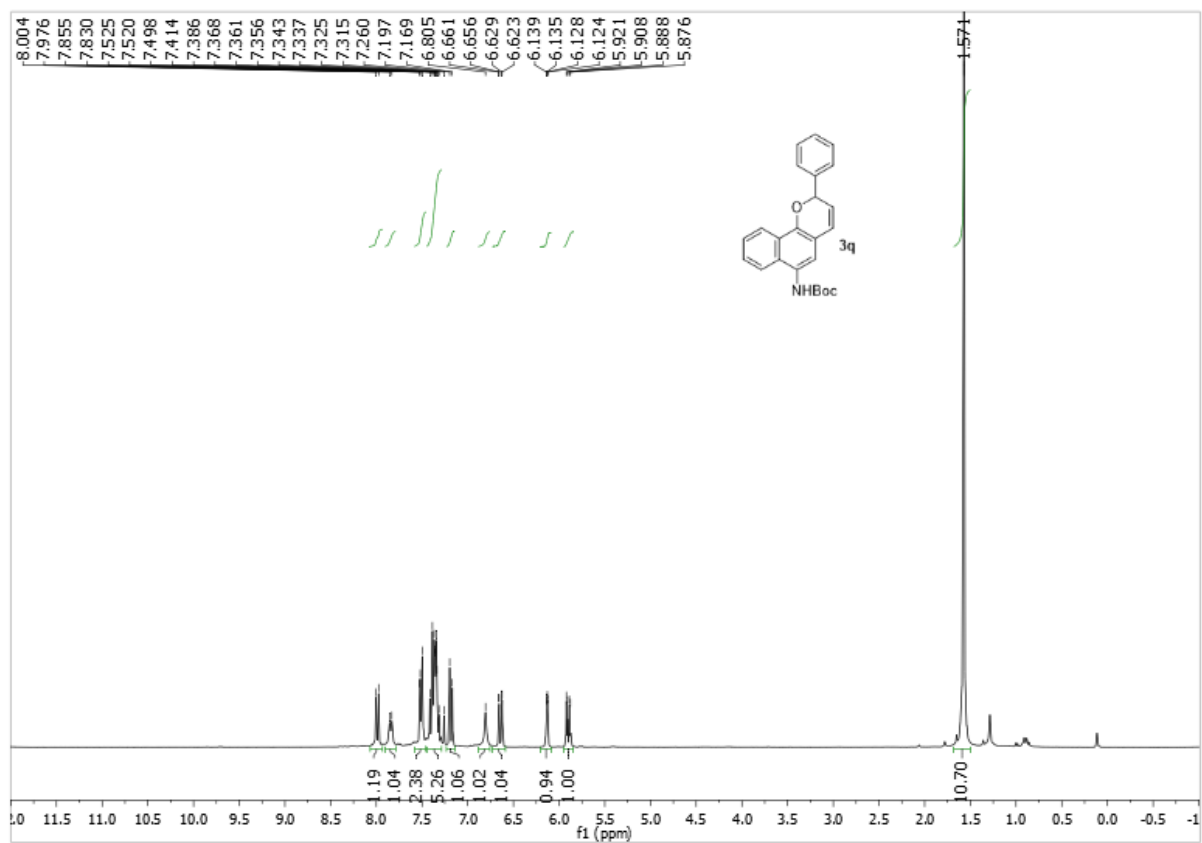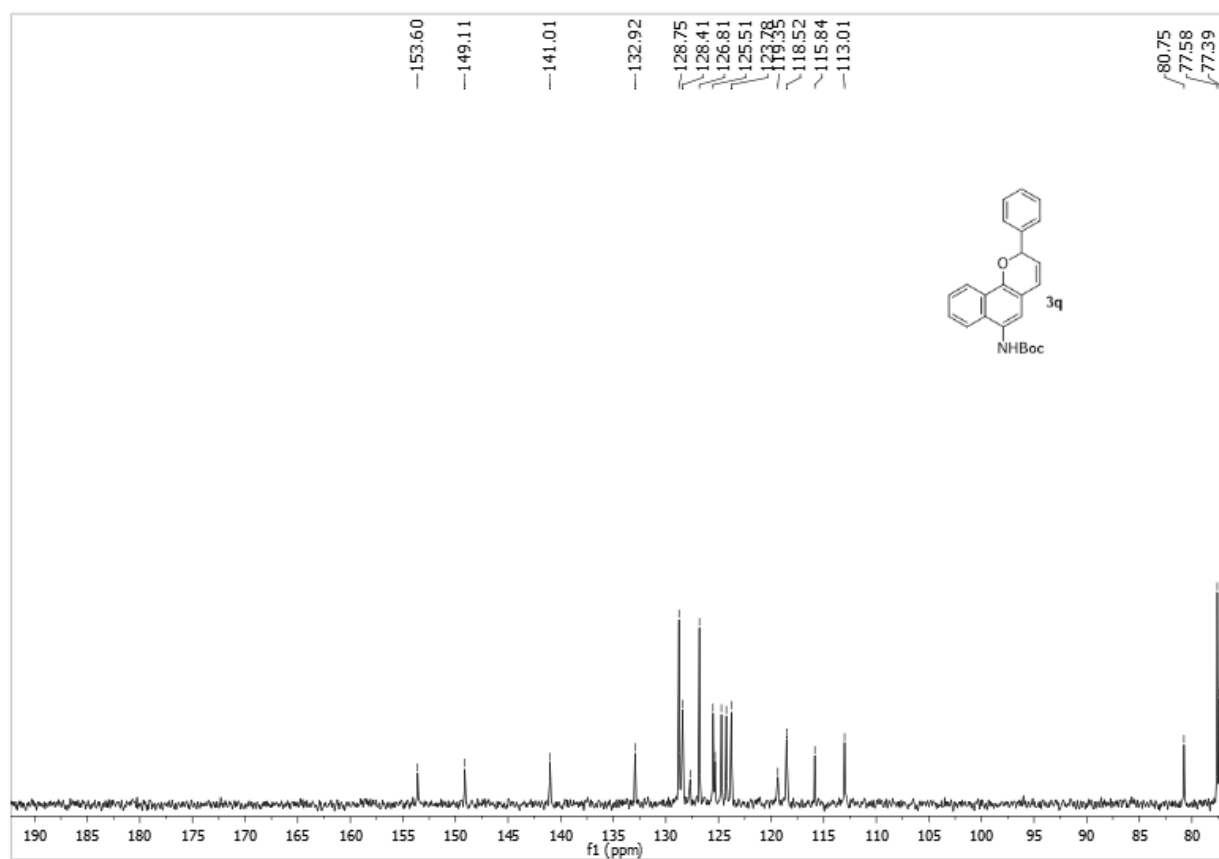

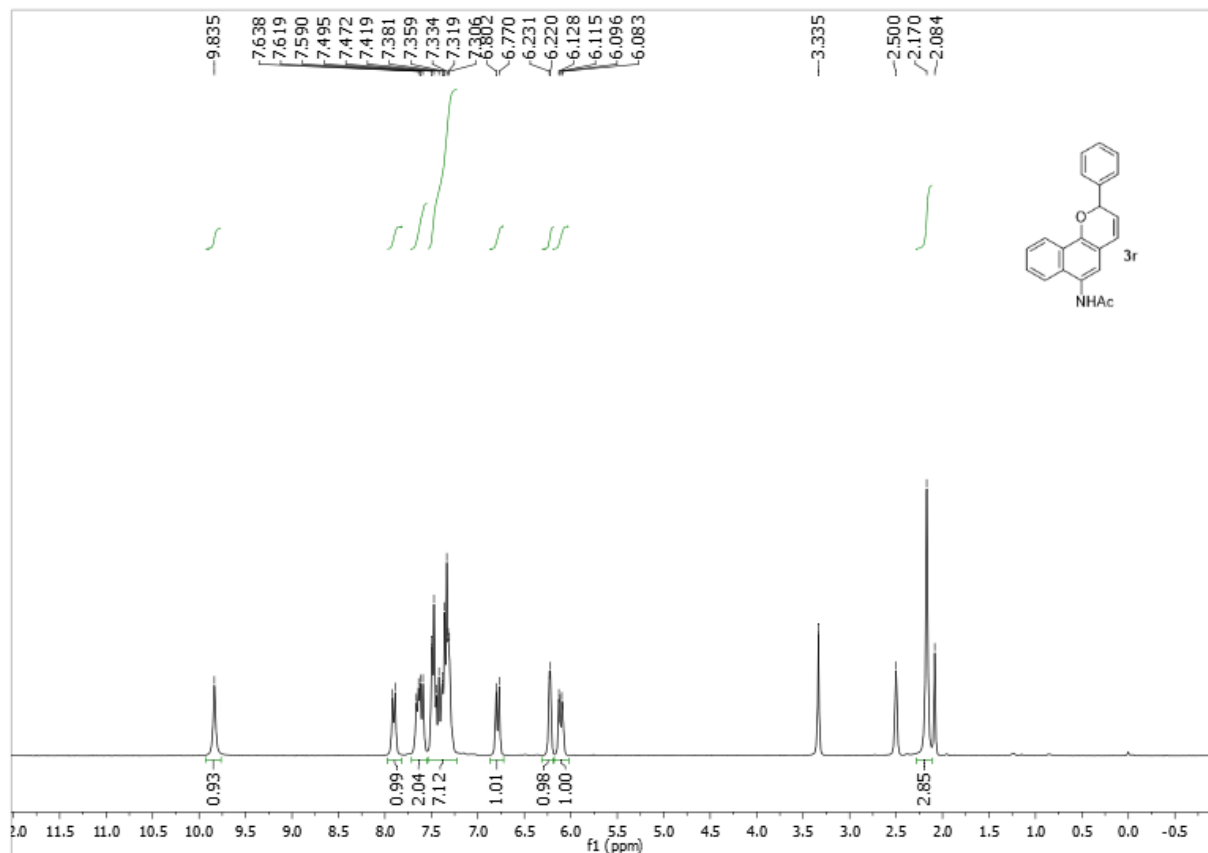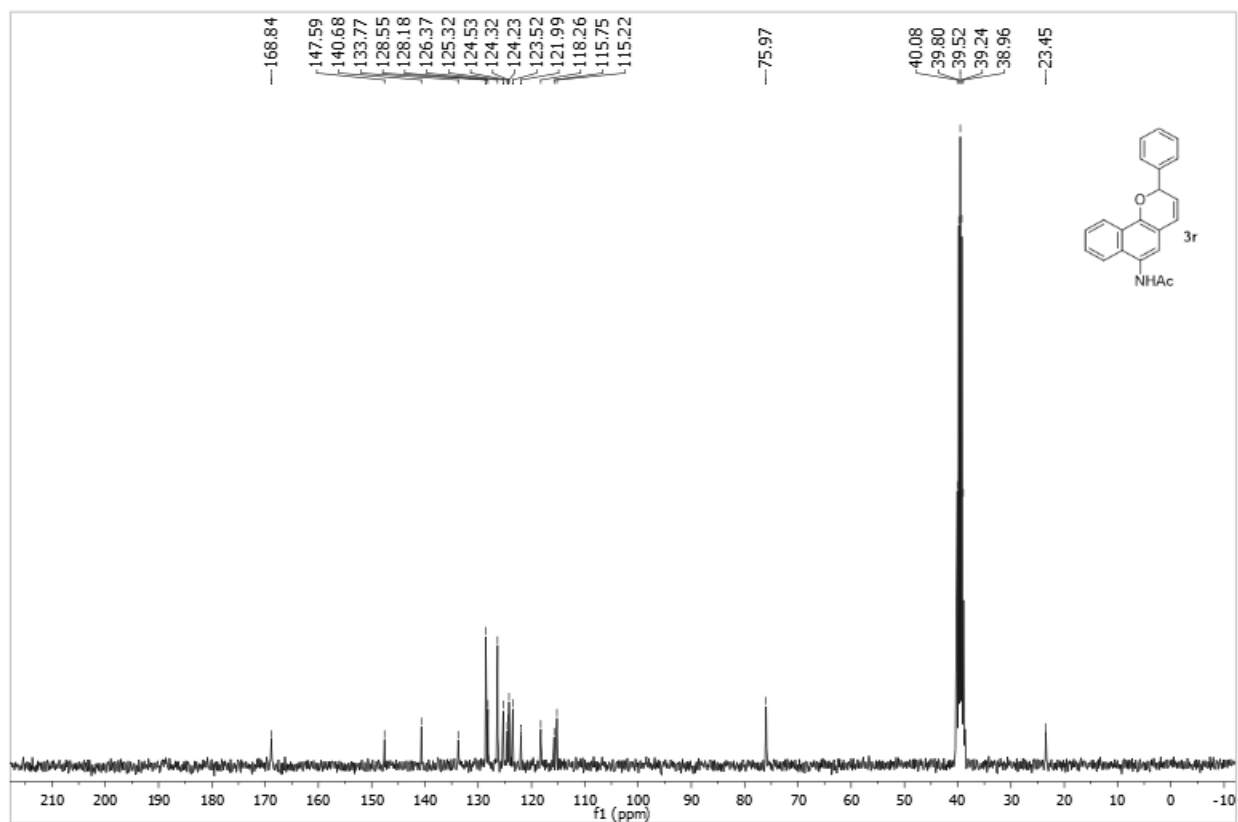

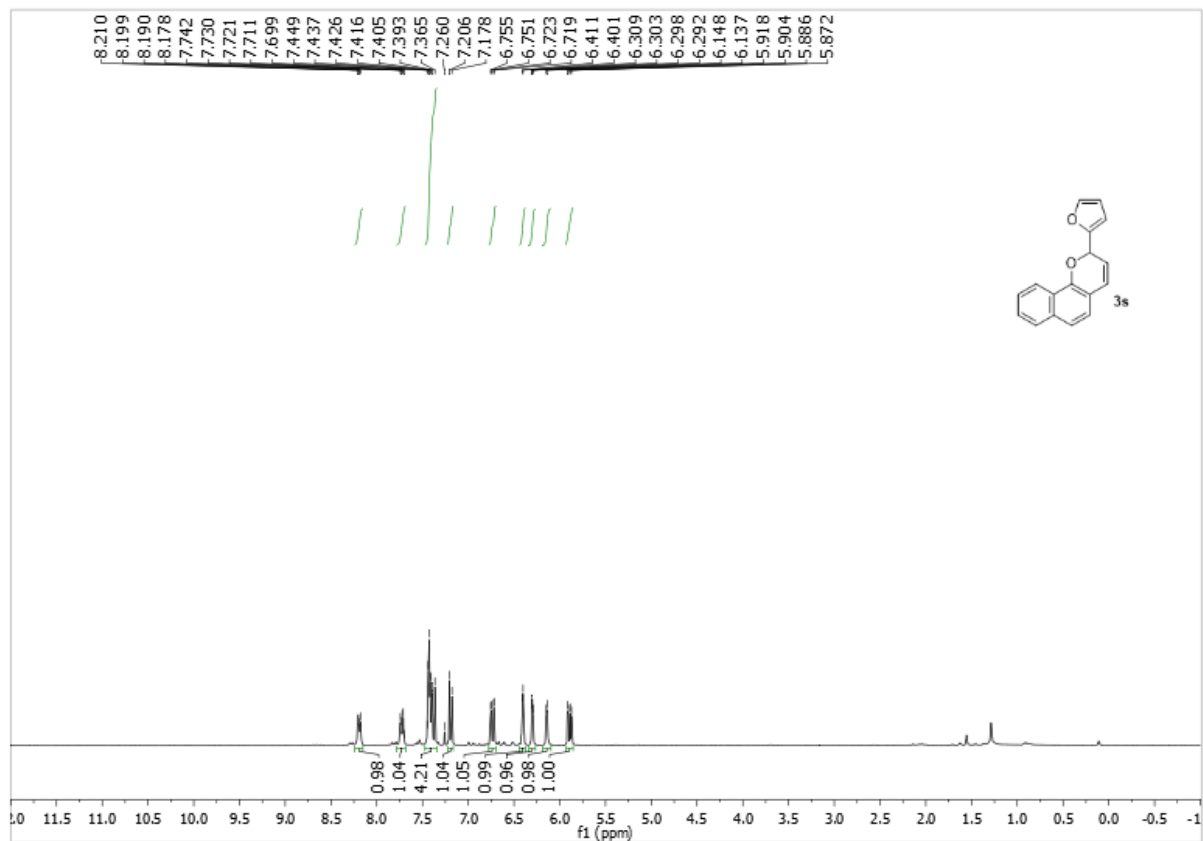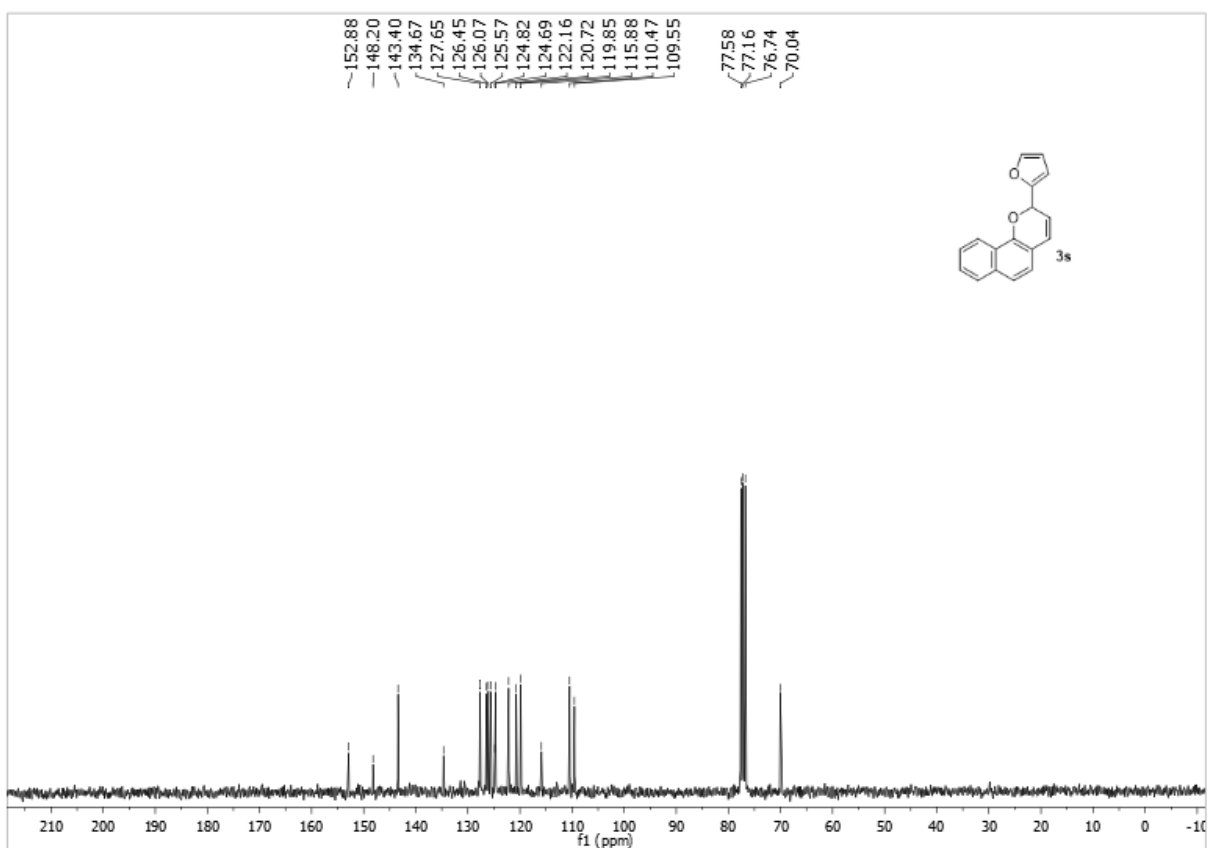

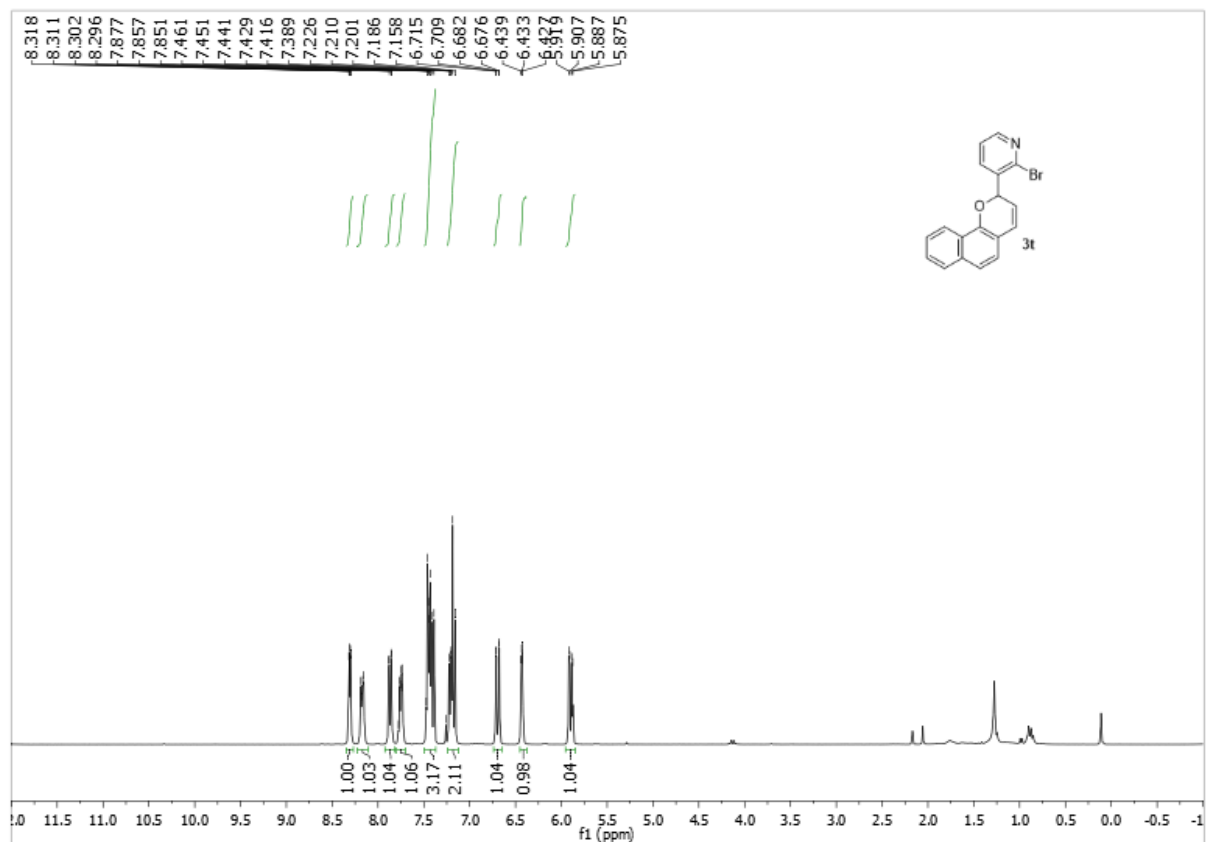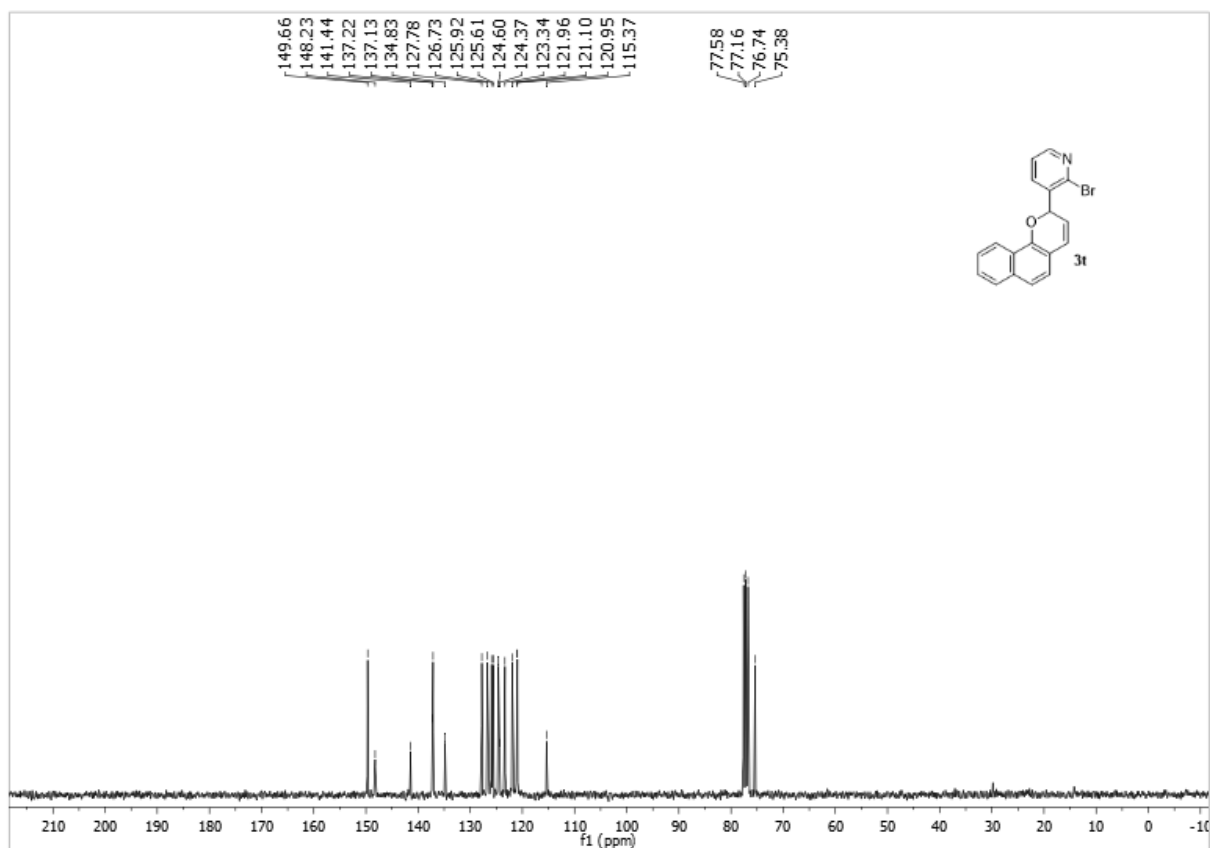

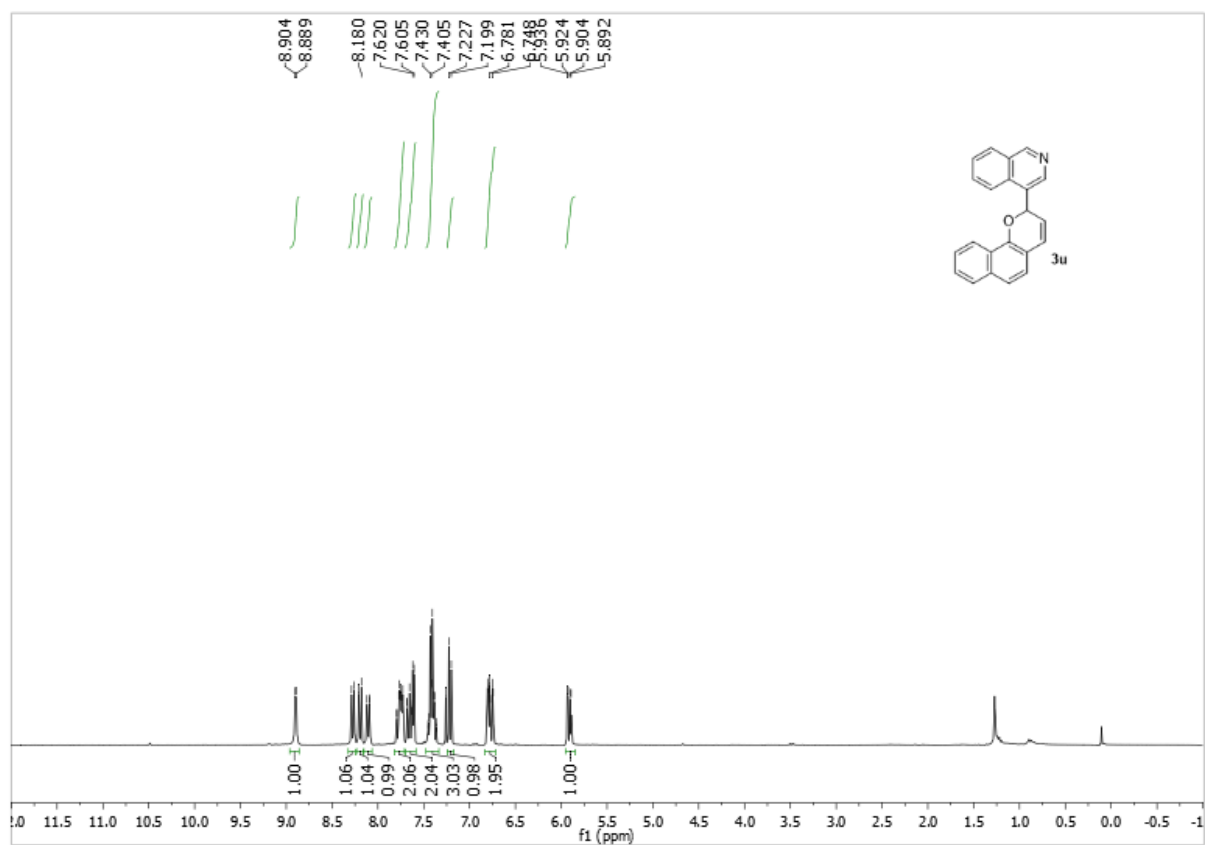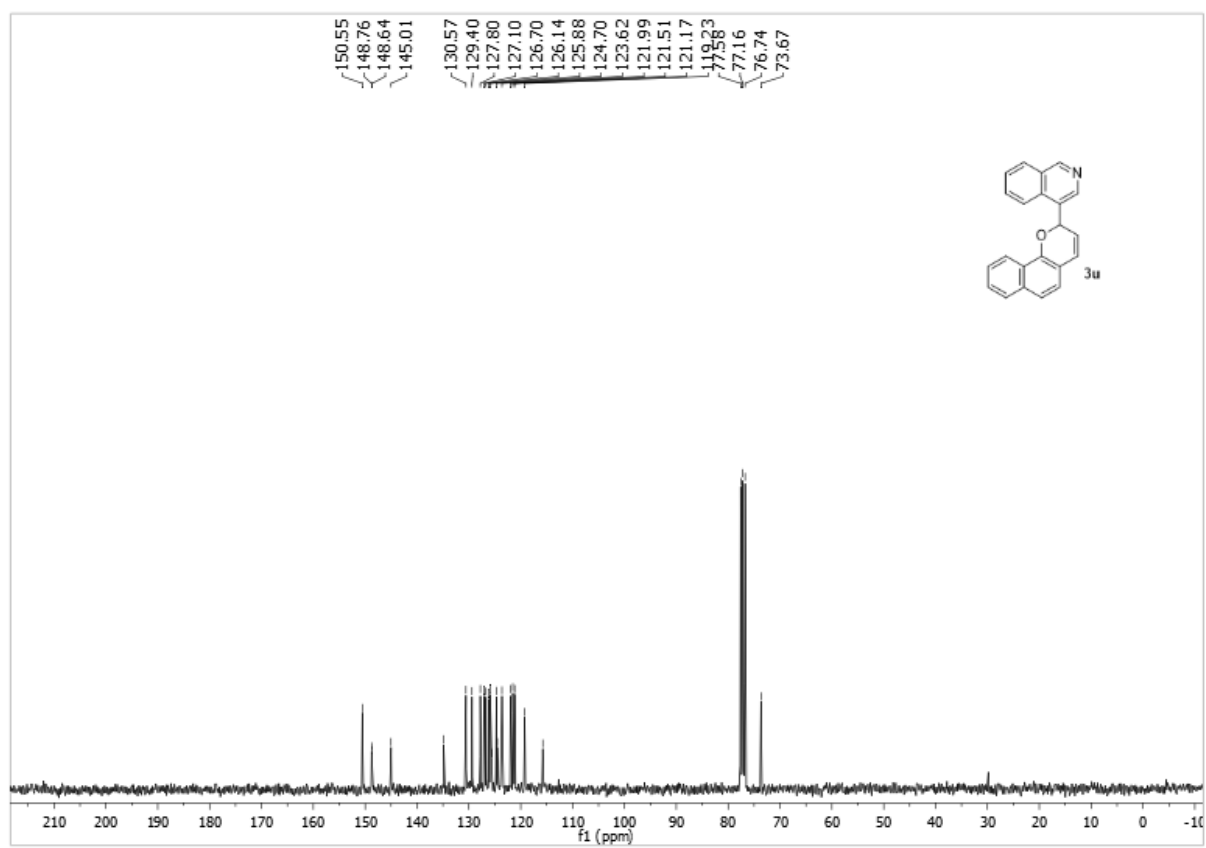

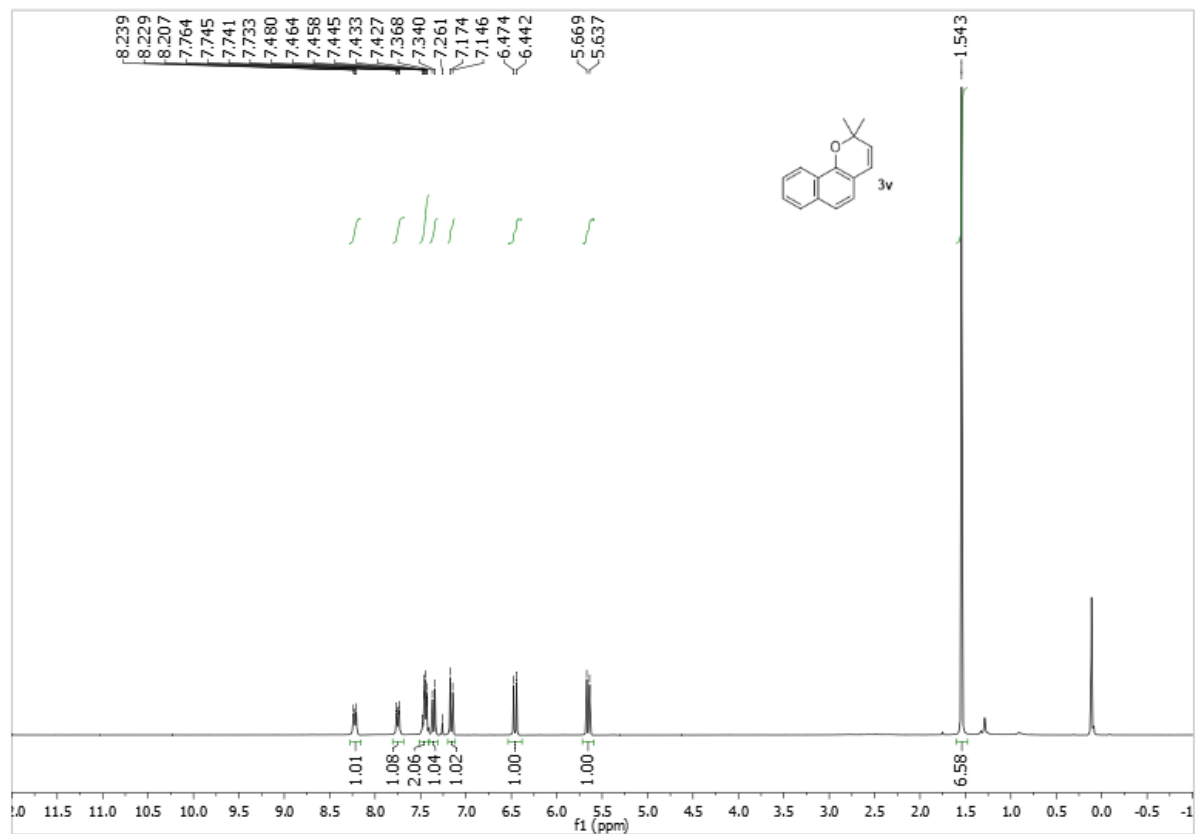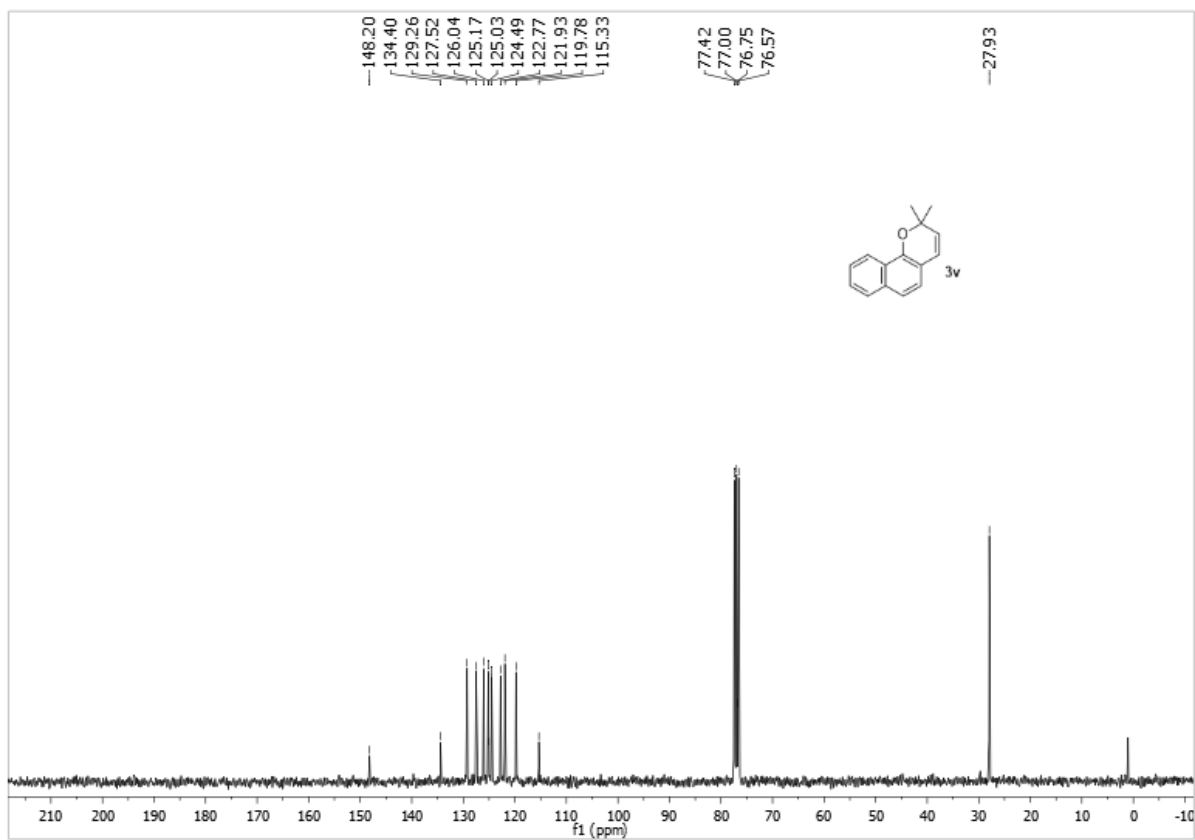

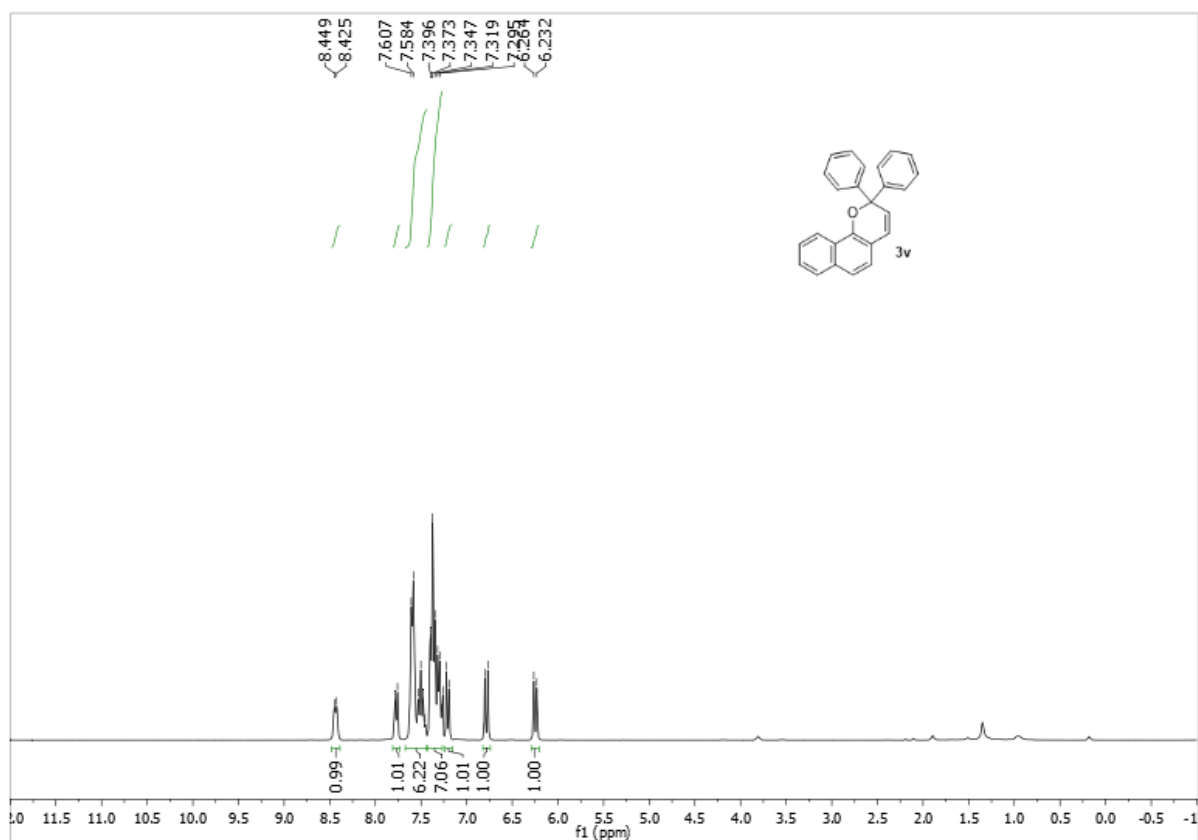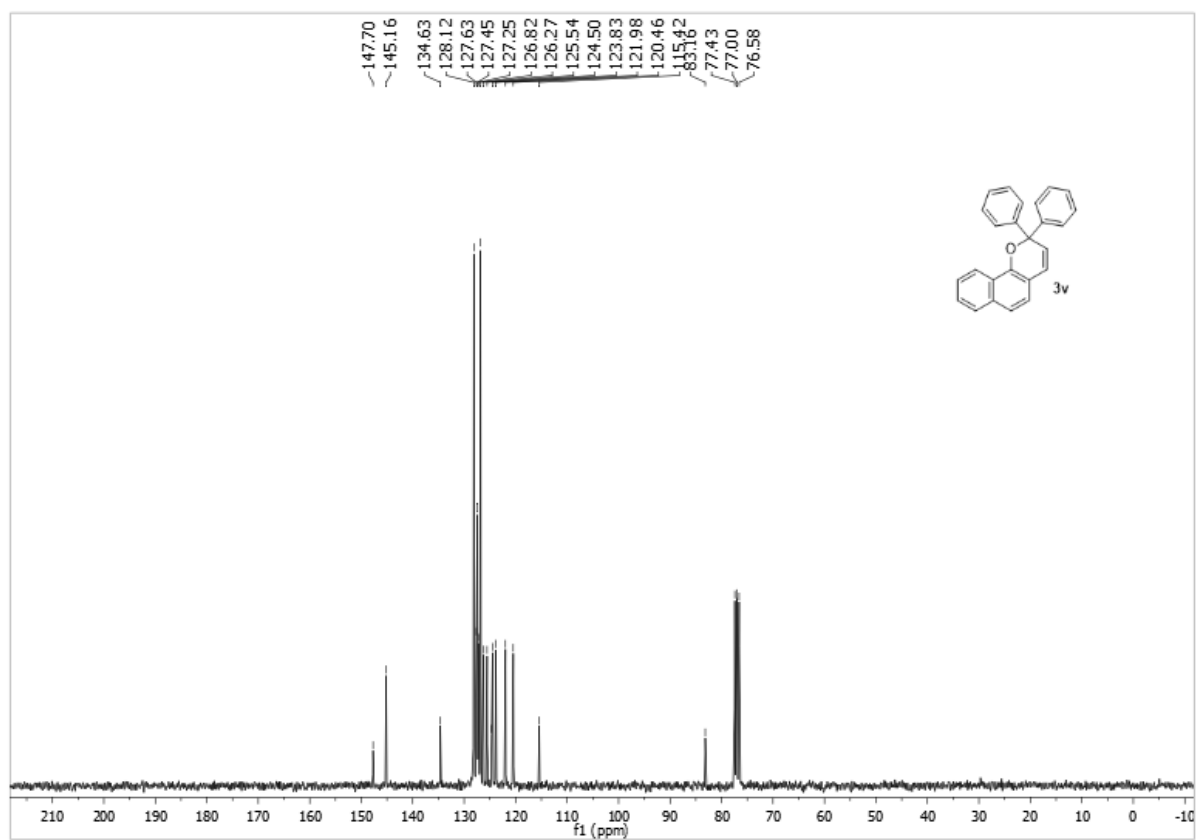



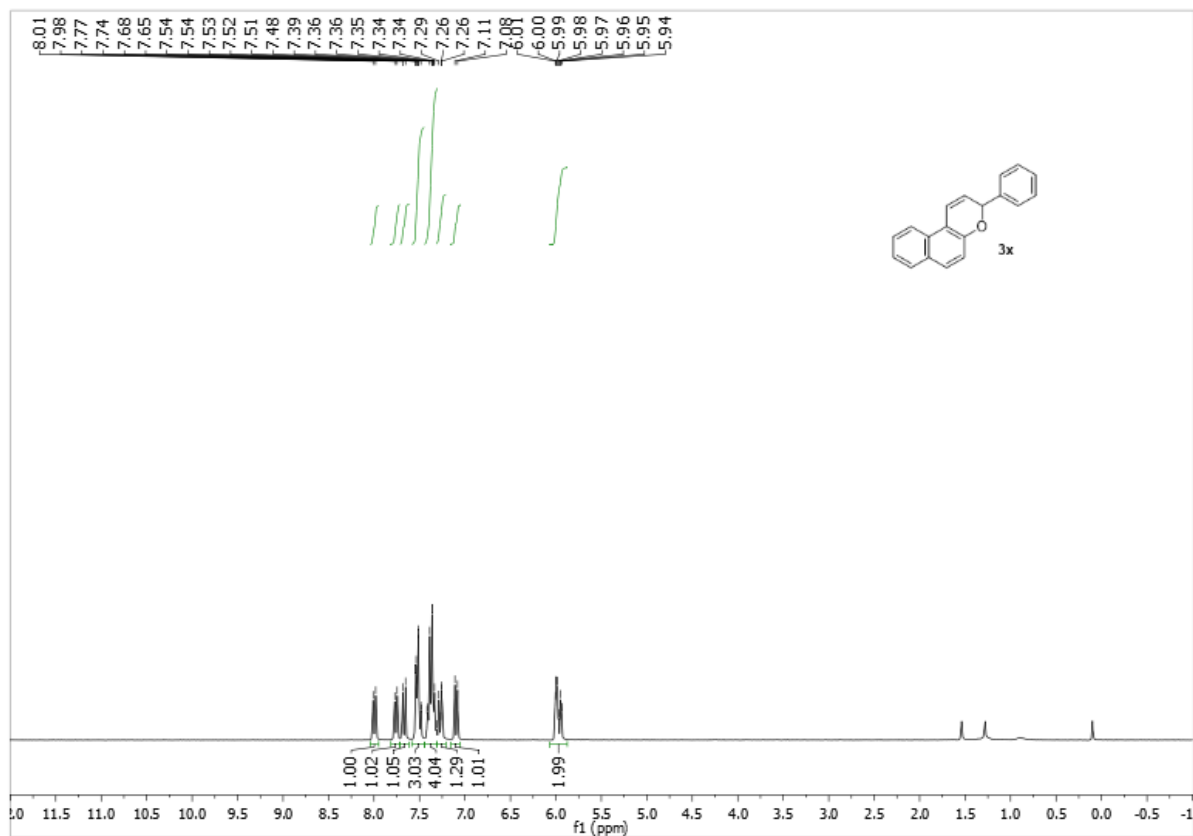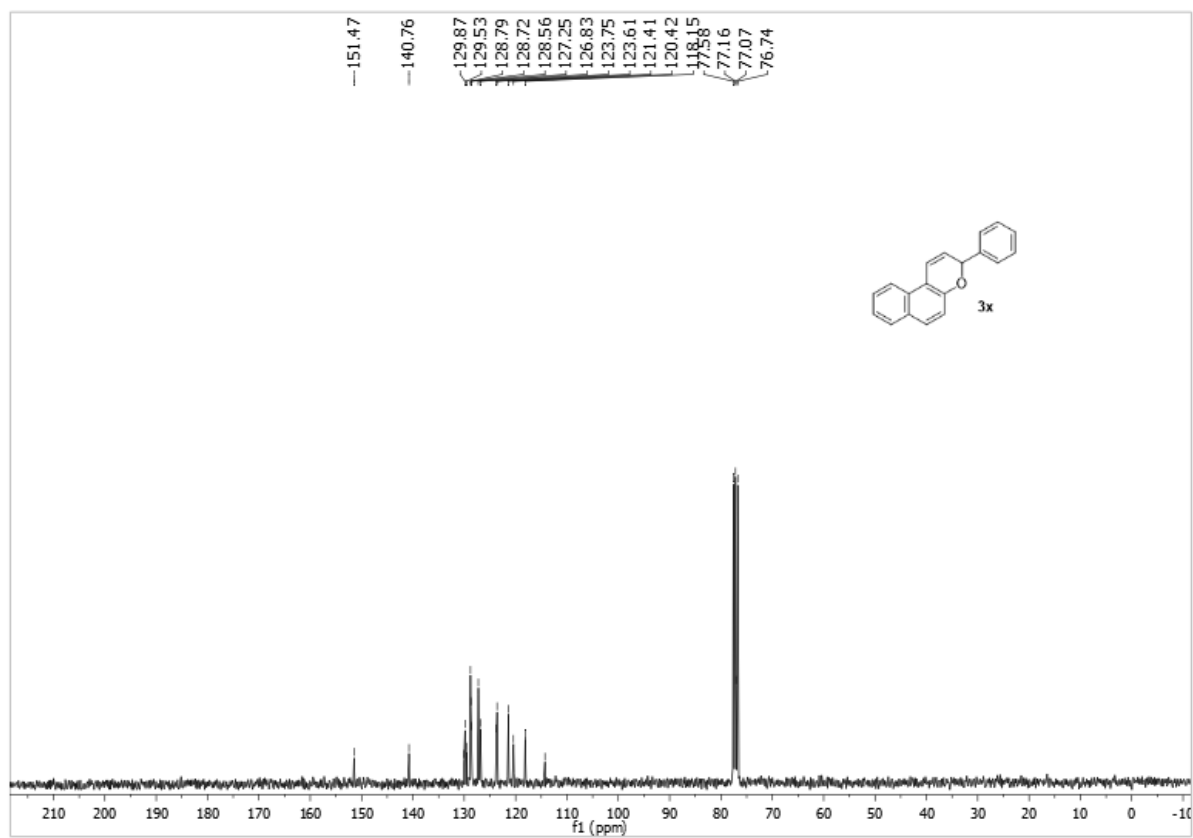

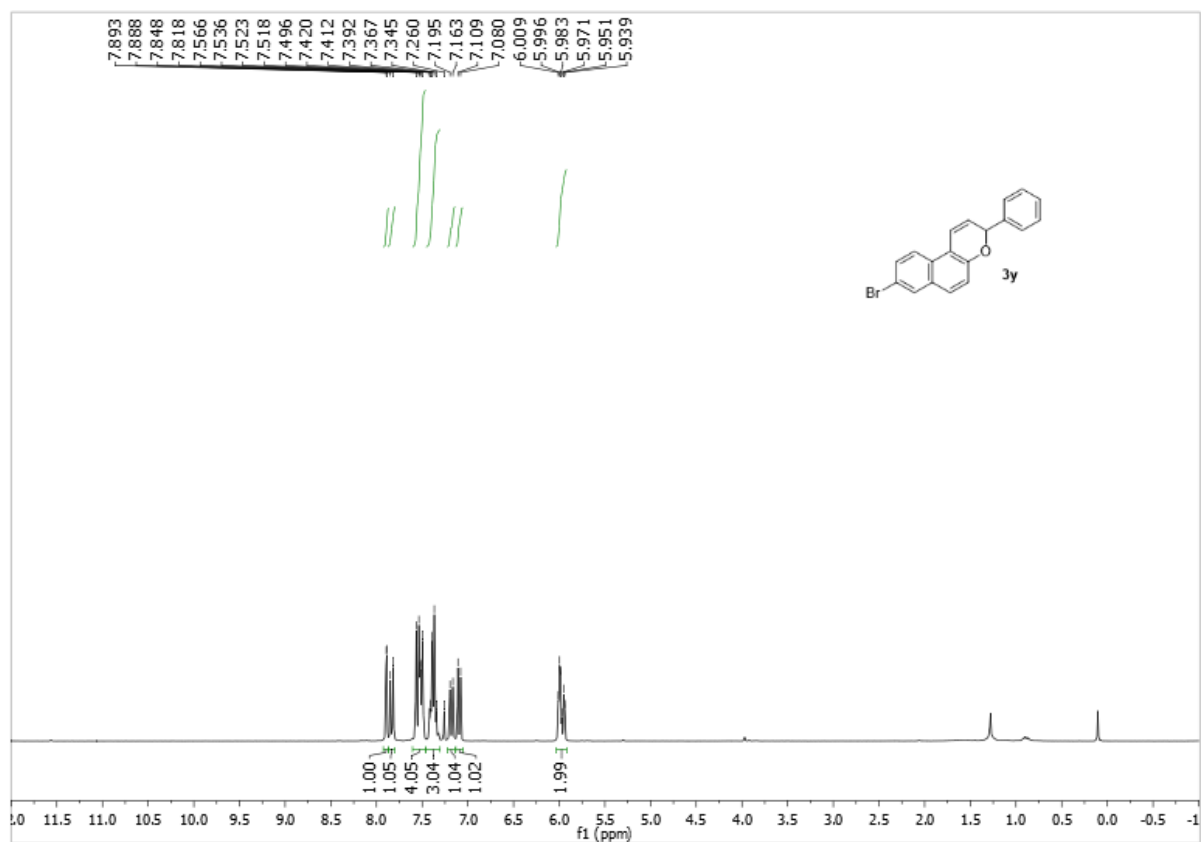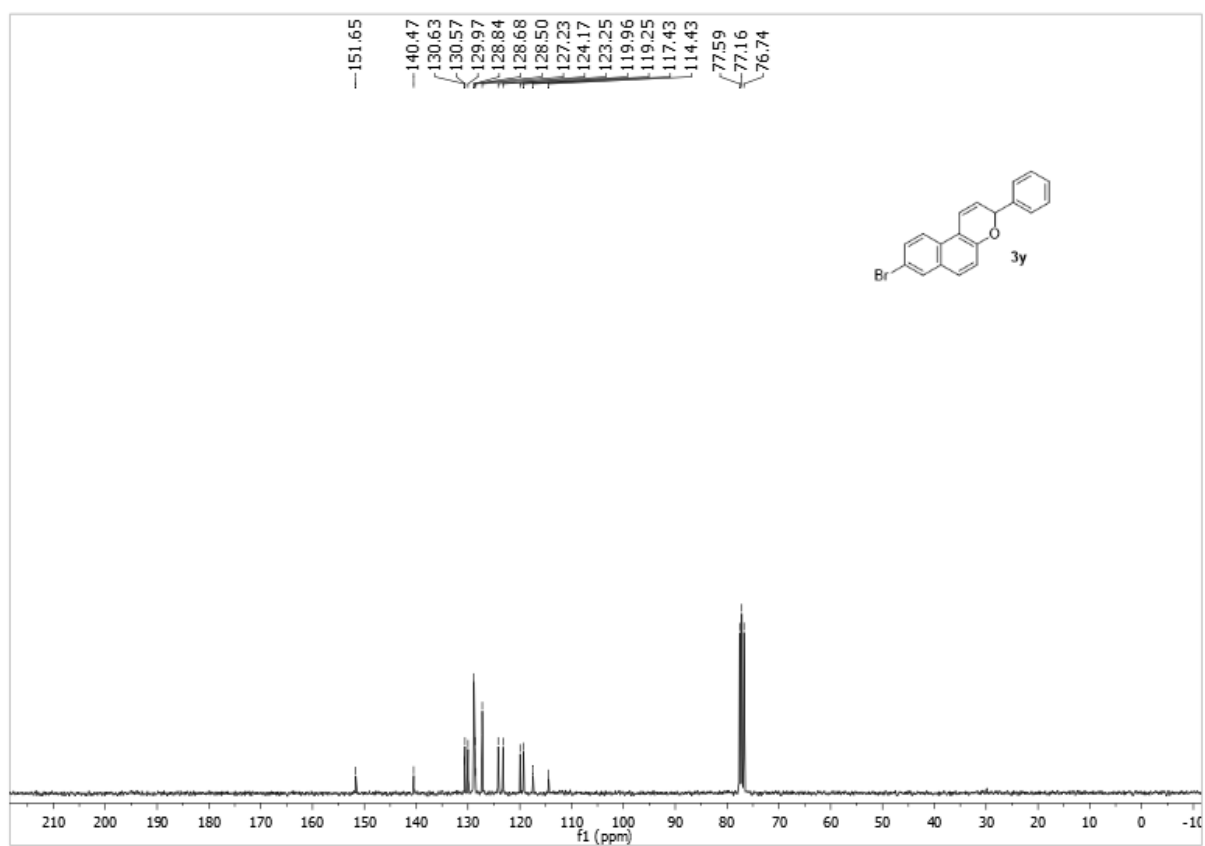

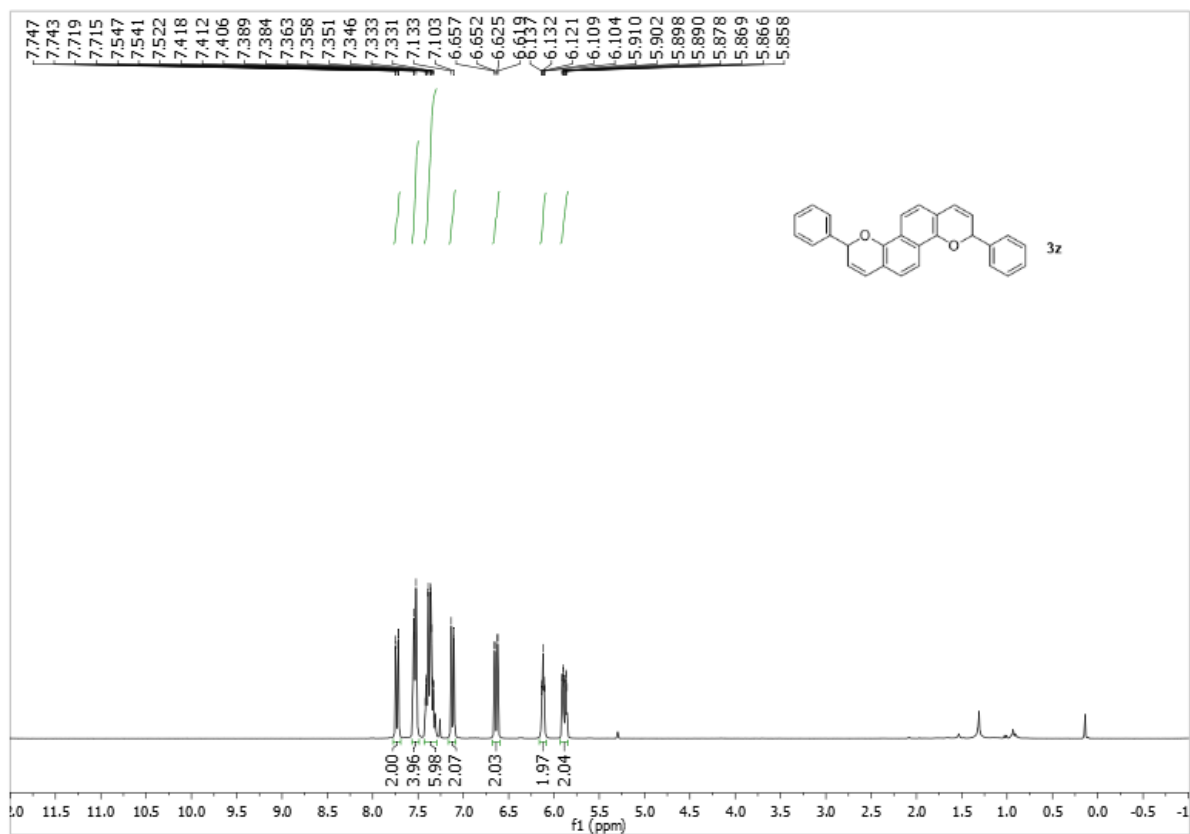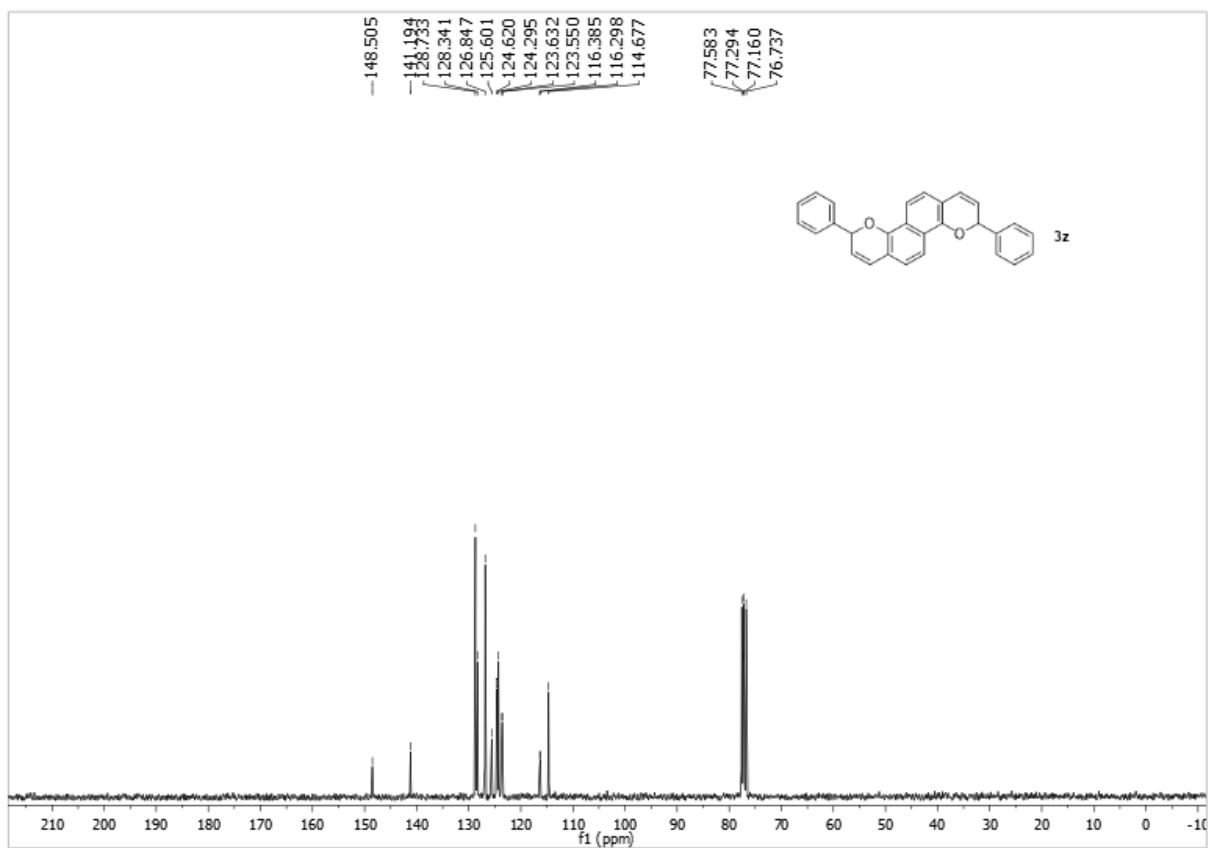

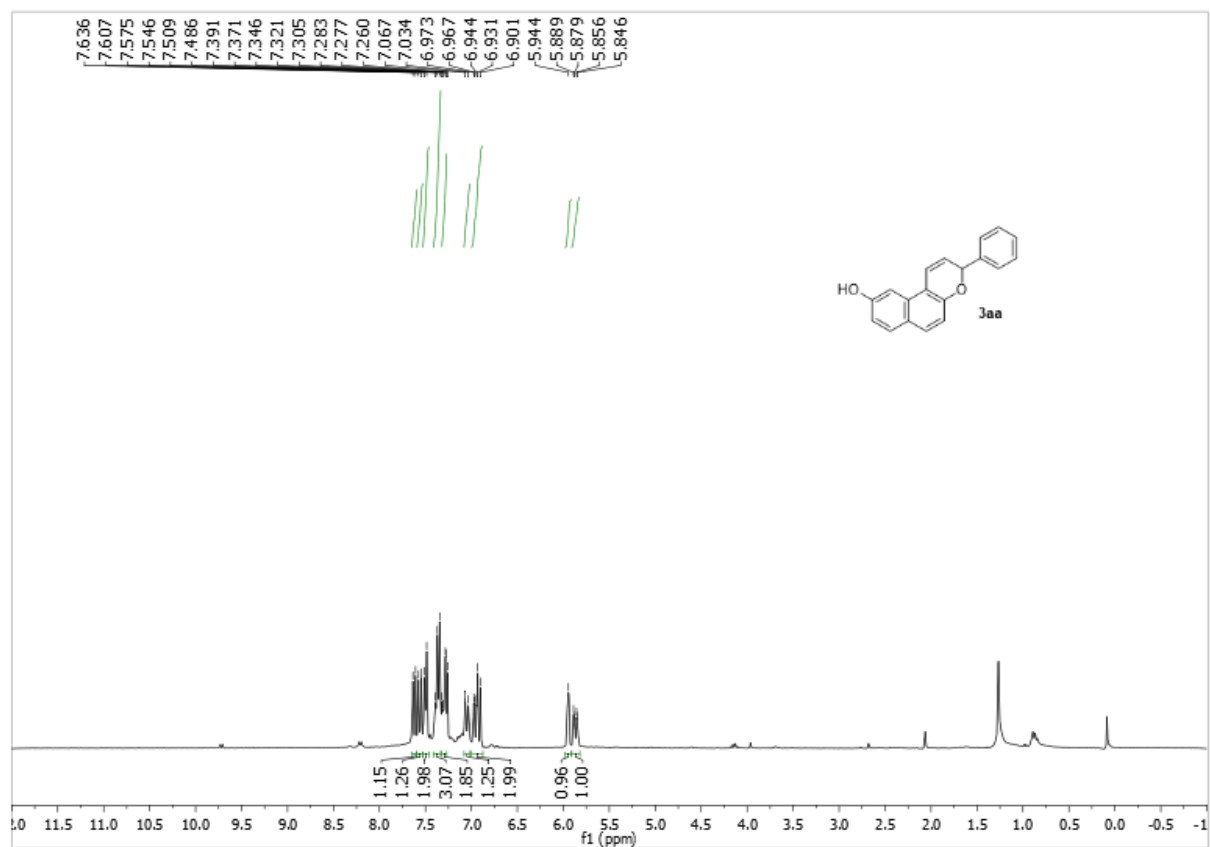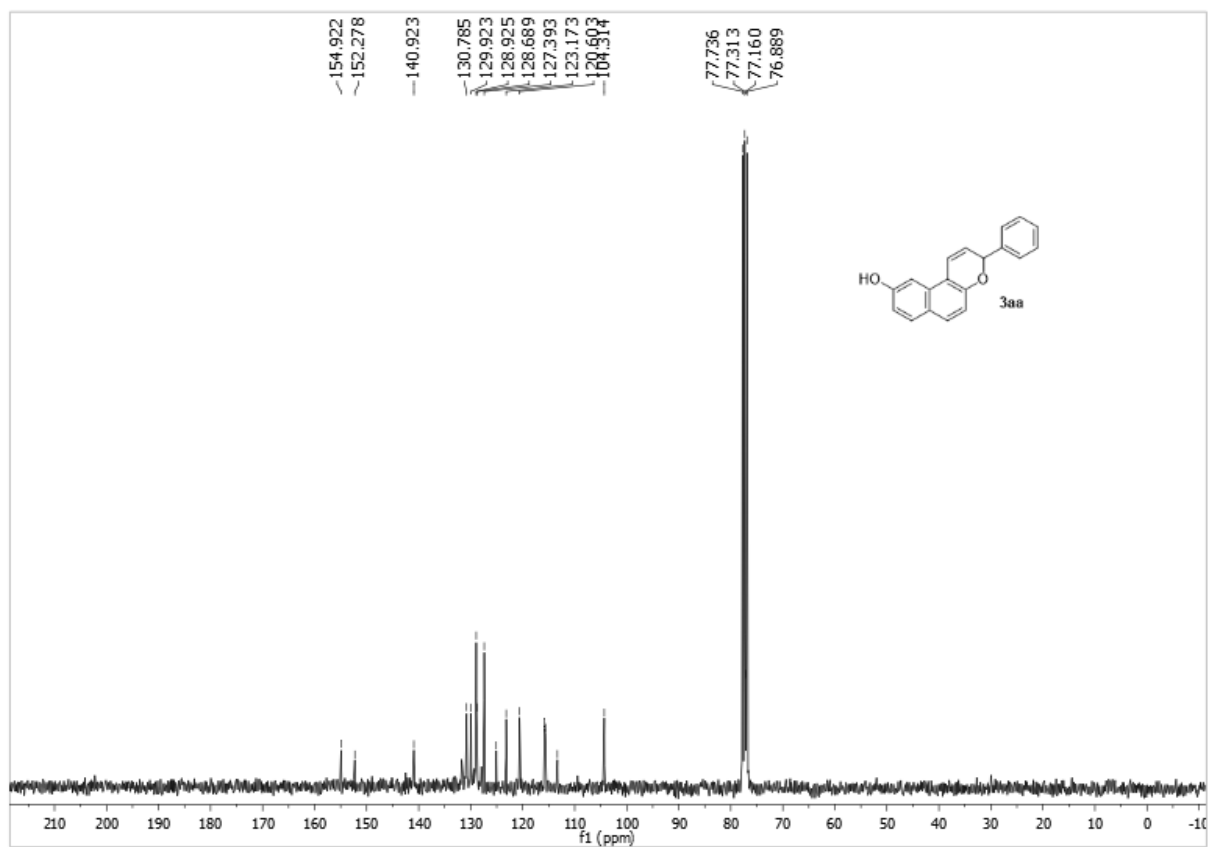

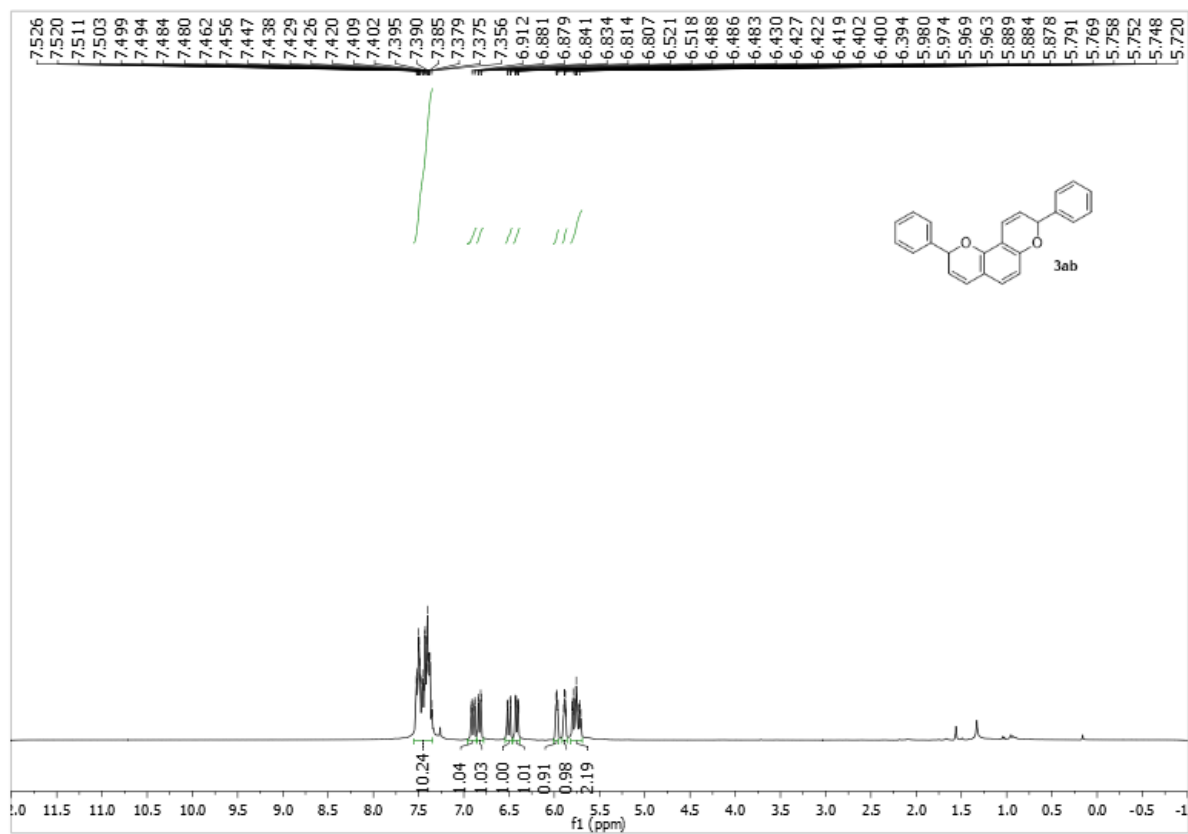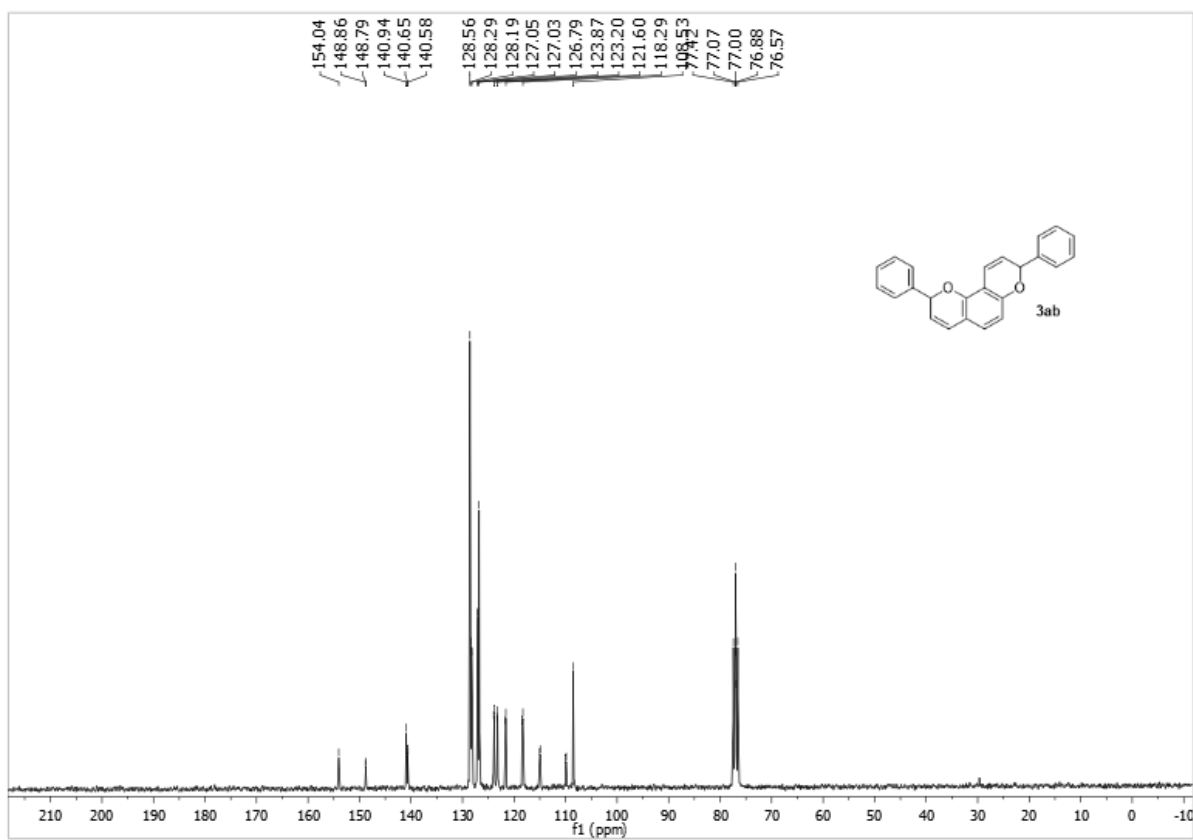

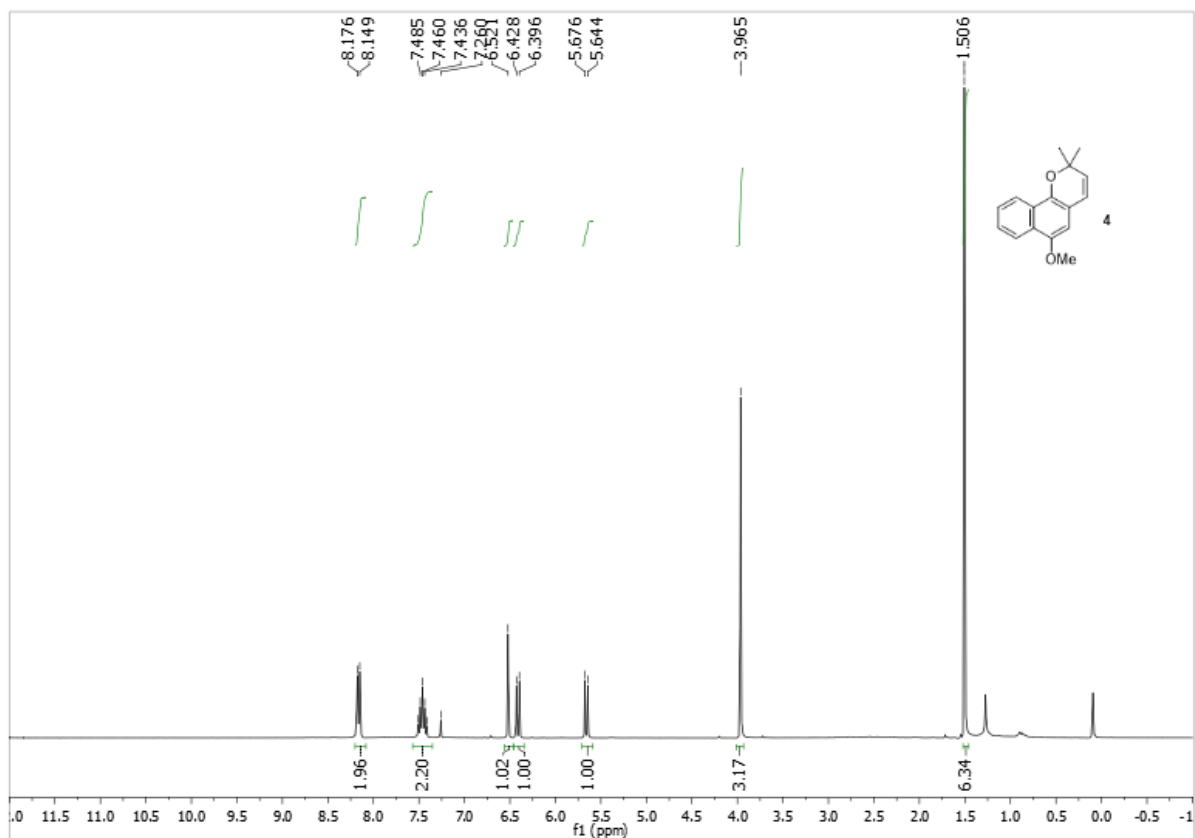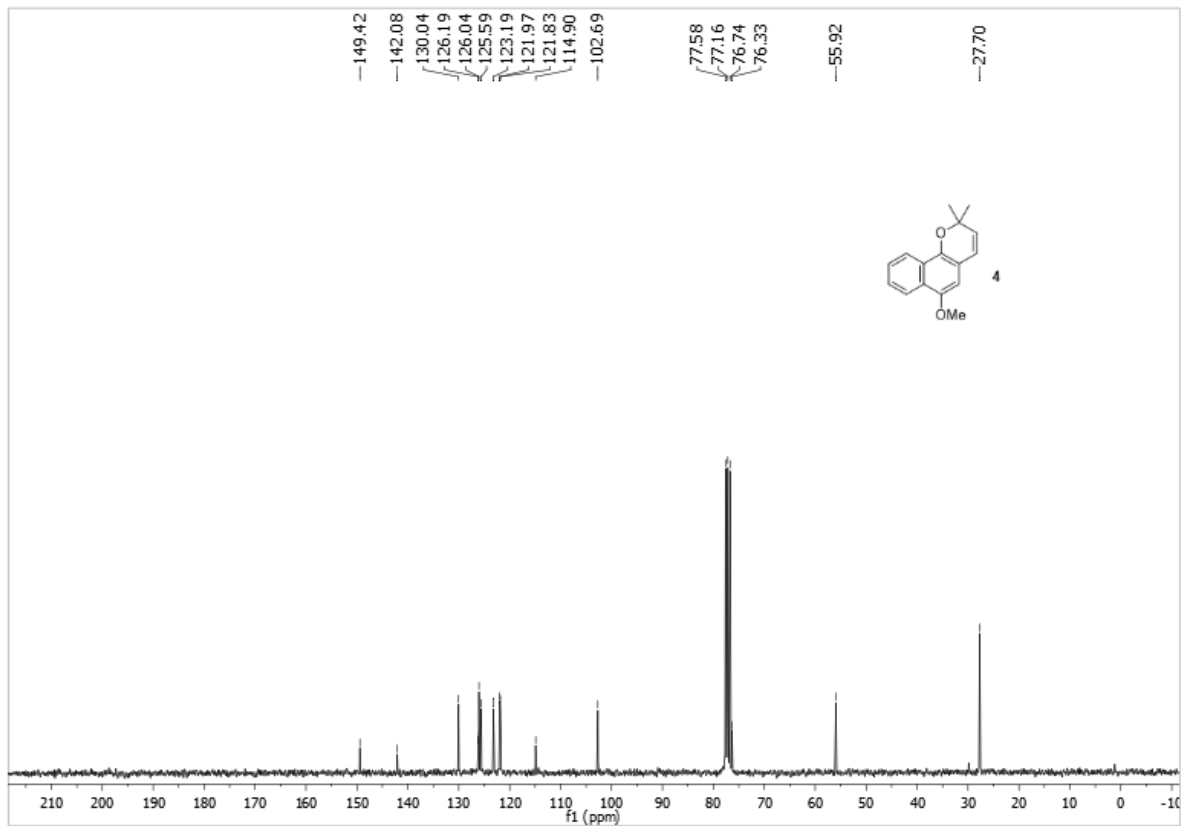

Supplement: s1 [file s1]
